scRNAseq comparison of healthy and irradiated mouse parotid glands highlights immune involvement during chronic gland dysfunction

Brenna Rheinheimer<sup>2</sup>, Mary C. Pasquale<sup>1</sup>, GCBC<sup>3</sup>, Kirsten H. Limesand<sup>2</sup>, Matthew P. Hoffman<sup>1</sup>, Alejandro M Chibly<sup>1\*</sup>

<sup>1</sup>Matrix and Morphogenesis Section, National Institute of Dental and Craniofacial Research, National Institutes of Health, Bethesda, MD 20892.

<sup>2</sup>Nutritional Sciences Department, University of Arizona, Tucson, AZ. 85721

<sup>3</sup>Genomics and Computational Biology Core, National Institute of Dental and Craniofacial Research, National Institutes of Health, Bethesda, MD 20892. USA.

**Running title.** Single cell RNAseq analysis of parotid glands

**Key words.** scRNAseq, salivary gland, parotid, PG, irradiation

\*Corresponding author:

Alejandro M. Chibly

Matrix and Morphogenesis Section, NIDCR, NIH, Bethesda, MD 20892, USA

Email: [martinez-chibly.agustin@gene.com](mailto:martinez-chibly.agustin@gene.com)

Current address: Reverse Translation, Oncology Bioinformatics, Genentech, Inc. 1 DNA Way, South San Francisco, CA. 94080

## 1 HIGHLIGHTS

- 2 • We generated a scRNAseq dataset of chronic post-irradiation injury in parotid glands
- 3 • A newly identified *Etv1*<sup>+</sup> epithelial population may be acinar precursors
- 4 • *Ntrk2* and *ErbB3* are highly specific *Etv1*<sup>+</sup> cell receptors that may mediate cell-cell
- 5 communication with myoepithelial cells
- 6 • CD8<sup>+</sup> T-cells and secretory acinar cells have the greatest transcriptional changes post-IR

## 9 SUMMARY

10 Translational frameworks to understand the chronic loss of salivary dysfunction that  
11 follows after clinical irradiation, and the development of regenerative therapies remain an unmet  
12 clinical need. Understanding the transcriptional landscape long after irradiation treatment that  
13 results in chronic salivary hypofunction will help identify injury mechanisms and develop  
14 regenerative therapies to address this need. Advances in single cell (sc)RNAseq have made it  
15 possible to identify previously uncharacterized cell types within tissues and to uncover gene  
16 regulatory networks that mediate cell-cell communication and drive specific cell states.  
17 scRNAseq studies have been performed for virtually all major tissues including salivary glands;  
18 however, there are currently no scRNAseq studies the long-term chronic effects of irradiation on  
19 salivary glands. Here, we present scRNAseq from control and irradiated murine parotid glands  
20 collected 10 months post-irradiation. We identify a previously uncharacterized population of  
21 epithelial cells in the gland defined by expression of *Etv1*, which may be an acinar cell precursor.  
22 These *Etv1*<sup>+</sup> cells also express *Ntrk2* and *ErbB3* and thus may respond to myoepithelial cell-  
23 derived growth factor ligands. Furthermore, our data suggests that CD8<sup>+</sup> T-cells and secretory  
24 cells are the most transcriptionally affected during chronic injury with radiation, suggesting  
25 active immune involvement during chronic injury post-irradiation. Thus, our study provides a  
26 resource to understand the transcriptional landscape in a chronic post-irradiation  
27 microenvironment and identifies cell-specific pathways that may be targeted to repair chronic  
28 damage.

## 31 Introduction

32 Of the three major pairs of salivary glands (SGs): the parotid (PG), submandibular (SMG),  
33 and sublingual (SLG), the PG produces the largest volume of saliva, particularly in response to  
34 gustatory stimulation. In addition, the PG is the most sensitive to irradiation (IR) damage, a  
35 therapeutic treatment for head and neck cancer that often results in permanent salivary  
36 hypofunction. In terms of understanding salivary gland biology, most studies have focused on the  
37 SMG both in the context of development and response to injury; however, each gland has unique  
38 functions and transcriptional profile (Gao et al., 2018). Here we set out to investigate the effects  
39 of irradiation damage to PGs in mice using single cell (sc)RNAseq.

40 The PG is primarily comprised of serous acinar cells which produce large volumes of  
41 watery serous saliva that is transported through the ductal system into the oral cavity to aid in  
42 digestion and protection of mucosal surfaces. Despite advances in tumor tissue targeting during  
43 radiotherapy, it is estimated that > 73% of head and neck cancer patients suffer from the chronic  
44 consequences of salivary gland damage months to years after the completion of radiotherapy  
45 (Jensen et al., 2010). Animal studies show that the acute effects of radiotherapy in the PG occur in  
46 the days and weeks following initial treatment and are likely a result of high levels of acinar cell  
47 death (Eisbruch et al., 1999; Grundmann et al., 2009; Henson et al., 1999; Robar et al., 2007),  
48 whereas the chronic effects arise months to years after initial treatment. Chronic loss of function  
49 is often attributed to fibrosis and the inability of acinar regeneration to occur, and preclinical  
50 studies suggest that persistent acinar cell proliferation, vascular damage, and parenchymal cell loss  
51 may be contributing factors (Dirix et al., 2006; Grundmann *et al.*, 2009; Li et al., 2007; Radfar and  
52 Sirois, 2003). In a similar manner, patients with Sjogren's syndrome, an autoimmune disease that  
53 damages the acinar cells of salivary and lacrimal glands, life-long consequences include dental  
54 caries, reduced taste and smell, malnutrition, mucositis, and increased risk for oral infections  
55 leading to a significant decrease in quality of life (Vissink et al., 2010). Therefore, translational  
56 frameworks to understand chronic glandular dysfunction following IR therapy along with the  
57 development of regenerative therapies remains an unmet need.

58 The development of scRNAseq has made it possible to identify previously uncharacterized  
59 cell types within a tissue and to uncover and gene regulatory networks and mechanisms regulating  
60 cell-cell communication and specific cell states (Grün and van Oudenaarden, 2015; Kolodziejczyk  
61 et al., 2015; Trapnell, 2015; Wang and Navin, 2015). To date, there have been scRNAseq studies  
62 performed for virtually all major tissues, including atlas-level scRNAseq datasets such as the

63 Tabula Muris (Tabula Muris et al., 2018) or the Tabula Sapiens (Tabula Sapiens et al., 2022) which  
64 integrate data from multiple organs in mouse and human, respectively. There are also numerous  
65 scRNAseq studies on disease-specific models, which are important to understand the cellular  
66 mechanisms involved that could be targeted for repair or regeneration. In SGs, scRNAseq studies  
67 have focused on either homeostasis or development (Chen et al., 2022; Hauser et al., 2020; Huang  
68 et al., 2021; Oyelakin et al., 2019; Sekiguchi et al., 2020), but not on injury or disease models.

69 In this study, we use scRNAseq analysis to characterize the adult mouse PG and compare  
70 the transcriptional landscape 10 months after IR damage as a model to explore chronic dysfunction  
71 post-irradiation. The model of SG IR used in this study recapitulates the loss of function observed  
72 in humans and has been instrumental in evaluating the therapeutic potential of adenovirus-  
73 associated neurturin-gene transfer (Ferreira et al., 2018). Thus, investigation of cell-type-specific  
74 gene expression in this model will be a valuable resource to understand the molecular mechanisms  
75 underlying health and disease in SGs. Due to the complex heterogeneity of the SGs, distinguishing  
76 cell-type compositional differences and their specific and direct contribution to the loss of saliva  
77 following radiation therapy is complex, and single-cell transcriptomics will begin to resolve this  
78 issue.

79 This dataset allows for discovery and exploratory research into the mechanisms and  
80 cellular processes driving PG dysfunction post-IR. Our work has been validated by  
81 immunofluorescence staining to confirm the presence of selected markers in specific cell  
82 populations, confirming the potential to reveal meaningful biological insights. It is noteworthy that  
83 scRNAseq of in vivo models of chronic IR injury has only been performed in liver (Xu et al.,  
84 2021), lung (Mukherjee et al., 2021), and skin (Paldor et al., 2022), and data is only publicly  
85 available for lung and skin. Thus, our study will also be an essential resource to better understand  
86 cell-specific responses to IR in general.

87

## 88 **Results**

### 89 **Generation of a single-cell resource of healthy and irradiated mouse parotid gland**

90 Using the 10X Genomics platform, we generated 2 individual scRNAseq libraries of  
91 healthy and IR mouse PG collected 10-months post-irradiation (Figure 1A). Mice received 5 Gy  
92 IR/day to the head and neck region on six consecutive days, for a total dose of 30 Gy. This mouse  
93 model of IR damage to SGs results in chronic loss of saliva with partial loss of epithelial cells

94 (Teos et al., 2016). Control and IR PG samples were bioinformatically integrated with SEURAT  
95 v3 and clustered following SEURAT's standard workflow (Stuart et al., 2019). The optimal  
96 resolution for clustering was determined using clustree package (Zappia and Oshlack, 2018) and  
97 the resulting 17 cell clusters were annotated based on their gene expression profile (Figure 1B,  
98 S1A-B) and a previously generated atlas of SMG development which provided cell type specific  
99 markers (Hauser *et al.*, 2020). Stromal and myoepithelial cells clustered together with endothelial  
100 cells likely due to the low number of cells recovered for these populations. Thus, they were  
101 manually annotated based on expression of a combination of stromal (*Colla12* and *Vim*) and  
102 myoepithelial (*Krt14* and *Acta2*) markers which were highly specific (Figure S1C-D). We did not  
103 identify discrete clusters of basal duct cells (*Krt14+Krt5+*) or peripheral nerves presumably due  
104 to limitations in the dissociation technique, which has been previously reported for adult SG tissue  
105 dissociation.

106 The identified populations included acinar cells (*Amy1+*), intercalated duct (*Dcpp1-3+*),  
107 striated duct (*Fxyd2+*, *Klk1+*), myoepithelial cells (*Acta2+Krt14+*), stromal (*Colla1+Vim+*),  
108 endothelial (*Pecam1+*), and 9 distinct immune populations including B-cells (*Cd79a+* and  
109 Immunoglobulin genes), five subtypes of T-cells (*CD4+*; *CD8+*; *CD4+CD8+*; *FoxP3+*;  
110 *Cxcr6+*), macrophages (*Adgre1+*), dendritic cells (*SI100a8/9+*), and natural killer cells  
111 (*Gzma+Nkg7+*). We also identified a previously uncharacterized epithelial population defined by  
112 high expression of *Etv1* and *Krt8* and moderate expression of *Amy1* (Figure 1B-C, S1B).

113

### 114 **Etv1 delineates an epithelial subpopulation, similar to SMG IDs that is involved in Rap1,** 115 **TNF, and ErbB signaling**

116 The two most striking observations from our initial clustering analysis are the identification  
117 of an *Etv1+* epithelial population and the prominence of multiple resident immune cell types after  
118 IR. *Etv1* is associated with embryonic development of the acinar epithelium in mouse SMG and  
119 its expression correlated with that of the acinar gene *Bhlha15/Mist1* (Hauser *et al.*, 2020) but it did  
120 not define a unique population in adult SMGs. In the developing SMG, *Etv1* is more highly  
121 expressed in end bud cells compared to ducts at E13 and increases in expression at E16 when  
122 proacinar differentiation begins (data from SGMAP, add Hauser et al, 2020). To characterize this  
123 *Etv1+* cluster, and to generate gene expression profiles of individual cell populations in healthy  
124 adult parotid glands, we performed differential expression analysis with SEURAT in the annotated

125 control sample (Figure 1C). Genes enriched in a given cluster are herein referred to as cell-defining  
126 genes and were sometimes expressed elsewhere at lower levels. The complete gene list is included  
127 in Supplementary File 1.

128 The expression of *Amy1* in *Etv1*<sup>+</sup> cells suggested an acinar-like phenotype. When  
129 comparing the gene expression profile of major epithelial populations, 38% of acinar-defining  
130 genes (30 of 79) were enriched in *Etv1*<sup>+</sup> cells (Figure 2A-B). Both cell types expressed serous  
131 secretory markers such as amylase (*Amy1*), parotid secretory protein (*Bpifa2*), prolactin induced  
132 protein (*Pip*), and carbonic anhydrase 6 (*Car6*), but their expression was significantly higher in  
133 acinar cells, while *Etv1*<sup>+</sup> cells had higher expression of *Krt8*, *Krt18*, and *Phlda1* (Figure 2C).  
134 When compared to duct populations, *Etv1*<sup>+</sup> cells expressed 38% (19 genes) of intercalated duct  
135 (ID)-defining genes (Figure S2A) and only 9.3% of striated duct (SD)-defining genes (Figure 2B,  
136 S2B), suggesting that *Etv1*<sup>+</sup> cells are transcriptionally similar to both acinar and ID populations.  
137 Accordingly, *Etv1* protein was detected by immunofluorescence in a subset of duct and acinar  
138 cells. Duct cells showed strong nuclear and cytoplasmic *Etv1*<sup>+</sup> signal while it was predominantly  
139 nuclear in NKCC1<sup>+</sup> acinar cells (Figure 2D).

140 Next, we performed functional analysis of all acinar and *Etv1*<sup>+</sup> cell-defining genes using  
141 STITCH (search tool for interactions of chemicals, <http://stitch.embl.de/>), which integrates  
142 information about interactions from metabolic and KEGG pathways, crystal structures, binding  
143 experiments, and drug-target relationships. (Kuhn et al., 2008). As expected, KEGG pathway  
144 analysis on acinar genes showed salivary secretion as one of the top pathways (Figure S2D). In  
145 contrast, in *Etv1*<sup>+</sup> cells the top functions and pathways were associated with organ development  
146 and activation of Rap1, TNF, and ErbB signaling pathways (Figure 2E, S2C), suggesting that the  
147 *Etv1*<sup>+</sup> population has distinct functions despite their transcriptional similarities to acinar cells.

148

### 149 **Computational analysis reveals potential interactions between myoepithelial cells, acinar,** 150 **and *Etv1*<sup>+</sup> cells via *ErbB3* and *Ntrk2* receptors**

151 Given that cellular functions are often initiated by ligand-receptor interactions that trigger  
152 signaling cascades, we next evaluated the presence of known ligands and receptors among the cell-  
153 defining genes for each population and used this information to predict putative cell-cell  
154 interactions. Ligand and receptor genes were identified based on a previously published database  
155 of curated ligand-receptor pairs (Ramilowski et al., 2015). In this database, a ligand is defined as

156 any molecule that interacts with known receptors and intracellular components such as *Hras* are  
157 included. Acinar and duct cells had the lowest number of enriched ligand and receptor genes  
158 compared to all other cell types while myoepithelial cells had the highest number across epithelial  
159 populations (Figure S3A-B). Nonetheless, we identified 9 ligand and 5 receptor genes among the  
160 *Etv1*<sup>+</sup> cell-defining genes, as well as 5 ligands and 2 receptors in acinar cells (Figure 3A). The  
161 identified receptor genes enriched in *Etv1*<sup>+</sup> cells included *Ghr*, *Ddtr1*, *St14*, *ErbB3*, and *Epha5*,  
162 which were highly specific to this population (Figure 3B, left panel). On the other hand, the ligands  
163 found in *Etv1*<sup>+</sup> cells were also enriched in other cell types, with the exception of *Col7a1*, which  
164 was highly specific (Figure 3B, right panel). A distinct set of ligands and receptors were enriched  
165 in acinar cells, including the receptor genes *Ntrk2* and *Kcnn4*, and the ligands *P4hb*, *Nucb2*, *Agt*,  
166 *Tcn2*, and *Pip*.

167 In order to automate the prediction of potential ligand-receptor interactions in a  
168 reproducible way, we used R scripted code to leverage the genes identified in our scRNAseq  
169 dataset against the database of ligand-receptor pairs (Ramilowski *et al.*, 2015). The source code is  
170 available as supplementary material. The resulting putative interactions between acinar and *Etv1*<sup>+</sup>  
171 cells with all other cell types are shown in Tables 1 and 2 and summarized as chord plots in Figure  
172 3D-E. All remaining putative interactions are available in supplementary file 2. Based simply on  
173 the total number of possible pairs (without accounting for the level of expression of individual  
174 genes), the strongest outgoing interactions from *Etv1*<sup>+</sup> cell ligands were predicted to occur with  
175 receptors in endothelial cells, whereas *Etv1*<sup>+</sup> cell receptors could primarily interact with ligands  
176 from myoepithelial and stromal cells (Figure 3D-E). Notably, a putative myoepithelial-*Etv1*<sup>+</sup> cell  
177 interaction was predicted via the *ErbB3* receptor and two of its ligands, Neuregulin1 (*Nrg1*) and  
178 *Nrg2* (Figure 3E).

179 A putative myoepithelial-acinar interaction was also predicted to occur via the  
180 neurotrophin receptor *Ntrk2* and one of its ligands, Neurotrophin 3 (*Ntf3*). *Ntrk2* was also  
181 expressed in *Etv1*<sup>+</sup>, myoepithelial and stromal cells in our scRNAseq data but  
182 immunofluorescence staining confirmed enrichment of the receptor in acinar cells of mouse  
183 parotid gland (Figure 3F). The cellular functions of *Ntrk2* in acinar cells are currently unknown  
184 and thus further mechanistic studies are warranted.

185

186 **CD8<sup>+</sup>CD4<sup>+</sup> T-cells and acinar cells have the greatest transcriptional response to IR**

187           The combined damage to the SG parenchyma and its microenvironment is proposed to be  
188 responsible for the lack of regeneration and subsequent loss of saliva that result from IR injury.  
189 Understanding how specific cell populations are affected by IR will inform future mechanistic  
190 studies for the development of cell-based regenerative therapies. Thus, our next goal was to  
191 characterize the cell-specific responses to chronic IR damage, both in terms of cell proportions and  
192 transcriptional profile. Given that we did not perform multiple technical replicates of each  
193 treatment, potential changes in cell proportions are reported as trends. In general, B cells and T  
194 cells were the most affected (Figure 4A-B). We observed a 33 % relative decrease in the proportion  
195 of B cells, a 39 % increase in CD4+ T cells, and an 195% (or 1.95 fold increase) increase in  
196 CD4+CD8+ T cells. A 22 % decrease in the proportion of acinar cells was also noted.

197           Differential expression analysis with SEURAT was performed between control and  
198 irradiated cell types. The complete list of differentially expressed genes (DEGs) is shown in  
199 supplementary file 3. CD4+CD8+ T-cells had the highest fold increase in cell number (~2 fold)  
200 after IR (Fig 4B) and the highest number of dysregulated genes (~70, but this is not on the graph)  
201 post-IR across all identified cell populations, followed by acinar cells (Figure 4C). We did not  
202 detect DEGs in MEC and stromal populations post-IR, and only 1 gene was differentially  
203 expressed in IR endothelial cells. The lack of DEGs in MECs is likely explained because of the  
204 low number of MECs analyzed (Figure 4B). Stromal and endothelial populations Stromal and  
205 endothelial cells also did not show significant changes in gene expression, but they were well-  
206 represented in our dataset; thus, cell numbers alone are not likely to account for the lack of DEGs  
207 post-IR in these populations. Instead, the lack of DEGs may reflect the fact that SG fibrosis does  
208 not consistently develop in mice post-IR. Alternatively, the endothelial and stromal populations  
209 may have recovered in this model a year after IR damage.

210           The top upregulated genes in acinar cells post-IR included *Actb*, *Tmsb4x*, and *Pfn1* which  
211 are involved in actin polymerization (Figure 4D). The genes *Gm42418*, *Hba-a1*, and *Smr3a* were  
212 the only downregulated genes in acinar cells and they were also downregulated in most other cell  
213 types (Figure S4A, Supplementary file 3), suggesting a global response to IR rather than an acinar-  
214 specific one. In CD4+CD8+ T-cells, the top upregulated genes post-IR were *Jun*, *Fos*, *Ltb*, *Klf2*,  
215 and *Klf6*, and the most downregulated genes were *Ctla2a*, *Tcp1l1l2*, *Crip1*, *Ramp3*, and *Tubb4b*  
216 (Figure 4D). In general, DEGs in acinar cells were associated with regulation of transepithelial  
217 transport, electron transport, apoptosis, and translation processes according to gene ontology



218 analysis via The Gene Ontology Consortium (The Gene Ontology Consortium, 2019), while  
219 DEGs in CD4+CD8+ T-cells were associated with V(D)J recombination, lymphocyte  
220 differentiation, apoptosis, axonogenesis, and ERK signaling pathway (Figure 4E).

221

## 222 **Predictive ligand-receptor analysis suggests dysregulation of cell-cell communication post-** 223 **IR in mouse PG**

224 To predict how gene expression alterations post-IR may impact cell-cell communication in  
225 the gland, we performed ligand-receptor pair analysis focusing specifically on ligands and  
226 receptors that were differentially expressed post-IR, particularly in acinar and CD4+CD8+ T-cells  
227 which were the most transcriptionally affected. We identified 5 ligands (*Ptma*, *Hsp90aa1*, *Ltb*,  
228 *Hspa1a*, and *Hras*) and 5 receptor genes (*Rpsa*, *Cd53*, *Ramp3*, *Cd28*, and *Ifngr1*) differentially  
229 expressed post-IR in our dataset (Figure 5A-B). Although these genes were expressed across  
230 multiple clusters and were not defining for any individual population, they were differentially  
231 expressed in specific cell types. For instance, *Hsp90aa1* was downregulated in all immune  
232 populations except NK cells and macrophages, and both *Hspa1a* and *Hras* were downregulated in  
233 NK cells (Figure 5A). Similarly, *Rpsa* was upregulated in acinar cells while *Ifngr1* was  
234 downregulated in CD4+CD8+ T-cells post-IR (Figure 5B). Putative pairs were found for *Rpsa*  
235 (Ribosomal protein SA (*Rpsa*), also known as Laminin receptor 1), *Ifngr1* (Interferon Gamma  
236 Receptor 1), *Hsp90aa1* (Heatshock protein 90 Alpha Family Class A Member 1), *Ltb*  
237 (Lymphotoxin Beta), and *Hras* oncogene (Figure 5C).

238 When considering the directionality of expression changes in differentially expressed  
239 ligands and receptors (upregulation vs downregulation) combined with the predicted interactions  
240 with their corresponding pairs, our analysis suggested increased paracrine signaling to acinar cells  
241 via *Lamb2-Rpsa* and decreased interactions between NK and CD8+ cells with CD4+CD8+ T-cells  
242 via *Ifng-Ifngr1* (Figure 5C-D). Similarly, paracrine signaling via *Hsp90aa1* from immune cells to  
243 *Egfr* expressed in myoepithelial, stromal, and endothelial cells was potentially reduced, while *Ltb*  
244 interaction with *Tnfrsf1a* and *Cd40* expressed by macrophages, endothelial cells, dendritic cells,  
245 and B-cells was potentially increased. Further studies are warranted to determine the functional  
246 relevance of these predicted interactions.

247

248

## 249 **Discussion**

250 We previously generated a scRNAseq atlas of SMG development (Hauser *et al.*, 2020),  
251 and others have published limited scRNAseq studies primarily focused on describing the  
252 heterogeneity of SGs during homeostasis (Oyelakin *et al.*, 2019; Sekiguchi *et al.*, 2020). Here, we  
253 build on our previous work and generate a scRNAseq resource of adult PG that includes a chronic  
254 IR injury model. One of the major surprises of this resource is that CD4+CD8+ cells have the  
255 highest number of DEGs while acinar cells had the second largest number of DEGs post-IR.  
256 Changes in acinar cell transcription is not unexpected as IR often reduces saliva output. Our data  
257 suggest chronic post-IR damage may be sustained by immunologic mechanisms. Thus, providing  
258 mechanistic insights into the chronic damage to acinar cells post-IR. This is significant given the  
259 clinical need to develop therapies to regenerate acinar cells (Jensen *et al.*, 2019). Furthermore,  
260 another surprising finding includes the characterization of a subpopulation of acinar and duct cells  
261 defined by expression of *Etv1* and *ErbB3* and the identification of putative ligand-receptor  
262 interactions between cell types during homeostasis and post-injury. For instance, Neuregulin 2 and  
263 3 (Nrg2, Nrg3), which bind *ErbB3* are primarily expressed in MECs, suggesting an interaction  
264 between MECs and *Etv1*+ cells. The significance of such interactions is covered in the next  
265 section.

266

### 267 **Characterization of a subpopulation of *Etv1*+ epithelial cells**

268 The development of single-cell RNA sequencing has allowed for high-throughput profiling  
269 of transcriptomes across cell types and states allowing for the detection of lowly expressed genes  
270 and rare cell types (Sandberg, 2014). Unbiased analysis of our data led to the identification of cell  
271 types present in the parotid SG including two distinct secretory populations (Acinar and *Etv1*+)   
272 based on their expression of Amylase 1 (*Amy1*). *Etv1* was recently associated with the development  
273 of the acinar epithelium in the mouse SMG but it is not known whether it represents a cell-type-  
274 specific marker or a cell state. The transcriptional profile of the *Etv1*+ population showed  
275 enrichment of *ErbB3* expression, which was supported by STITCH analysis. These findings are  
276 intriguing as *ErbB3* signaling is critical for SG development and plays a crucial role in  
277 organogenesis. It has been shown previously that branching morphogenesis of the embryonic  
278 mouse SMG depends on intraepithelial signaling mediated by *ErbB2*, *ErbB3*, and neuregulin  
279 (NRG-1) (Miyazaki *et al.*, 2004). Expression of *ErbB3* was found mainly in the epithelium of the

280 developing murine SMG at E12-15 and epithelial morphogenesis occurring after E15 was reduced  
281 following treatment with an anti-NRG-1 neutralizing antibody. Additionally, *Nrg1*-null embryos  
282 show reduced innervation and defective branching morphogenesis (Mattingly et al., 2015;  
283 Nedvetsky et al., 2014). Thus, it is plausible that *Etv1*<sup>+</sup> (*ErbB3*<sup>+</sup>) cells in the adult parotid gland  
284 could be involved in either replenishment of the epithelium or wound healing, and may function  
285 as a proacinar population in the PG. Furthermore, our data shows that *Nrg1* and *Nrg2* are  
286 differentially expressed by myoepithelial cells, suggesting paracrine regulation of this signaling  
287 via myoepithelial-*Etv1*<sup>+</sup>:*ErbB3*<sup>+</sup> proacinar communication.

288

### 289 **Applications of this resource to investigate intercellular communication**

290 Cell-surface and transmembrane receptors confer cells with unique abilities to translate  
291 signals from their microenvironment into cellular outcomes, such as proliferation, migration,  
292 differentiation, response to infections, secretion, and contraction. Because receptors often bind  
293 multiple ligands, the exact outcome is determined by the specific ligand-receptor pair and the  
294 influence of coreceptors. A major advantage of scRNAseq is that it allows identification of ligand–  
295 receptor pairs to infer intercellular communication networks (Armingol et al., 2021) both in the  
296 context of tissue homeostasis and during injury. This information can be used to predict potential  
297 interactions that could be tested in models to ultimately improve cell-based therapies. For instance,  
298 the intercellular interactions that occur between acinar cells and their microenvironment are likely  
299 to influence their response to damage and their ability to regenerate.

300 Our finding that the neurotrophic receptor *Ntrk2* is enriched in acinar cells is interesting  
301 because of the precedent of using neurotrophic factors such as neurturin to preserve function in  
302 irradiated SGs (Ferreira *et al.*, 2018; Lombaert et al., 2020). Ligand-receptor analysis predicts that  
303 stromal and myoepithelial cells communicate with *Ntrk2*-expressing acinar cells via *Ntf5* and *Ntf3*,  
304 respectively. Considering the localization of myoepithelial cells surrounding acinar cells, it is  
305 likely that both juxtacrine and paracrine signaling takes place. The function of the *Ntrk2* receptor  
306 in salivary acinar cells is not known but the gene is also highly expressed in Neurogenin 3-positive  
307 (*Ngn3*<sup>+</sup>) endocrine progenitors in the pancreas (Shamblott et al., 2016) and its activation regulates  
308 *Ngn3*<sup>+</sup> cell fate commitment. Neurotrophin receptors are also mutated or upregulated in a variety  
309 of cancers, suggesting a role in proliferation and differentiation. In the SMG, *Ntrk2* is expressed  
310 in serous acinar cells but not in seromucous acinar cells (Hauser *et al.*, 2020), indicating that *Ntrk2*

311 signaling may be important for the serous acinar phenotype, which is predominant in the PG.  
312 Furthermore, we recently identified that *NTRK2* is highly upregulated in myoepithelial cells of  
313 irradiated human SGs along with other neurotrophin receptors and stimulation of neurotrophin  
314 signaling *in vitro* promoted myoepithelial differentiation (Chibly AM. *et al.* 2022). In the lacrimal  
315 gland, neurotrophins are expressed in acini while neurotrophin receptors are expressed by  
316 myoepithelial cells (Ghinelli et al., 2003), suggesting that neurotrophin signaling may mediate  
317 intercellular communication between acinar cells and myoepithelial cells in other exocrine tissues.  
318 Moreover, given that *Ntrk2* is expressed on the cell surface, it may also provide a viable strategy  
319 to FACS-sort acinar cells from parotid gland to investigate expansion or differentiation of acinar  
320 cells *in vitro*. The latter application would likely require a combination of markers since *Ntrk2* is  
321 also expressed in *Etv1*<sup>+</sup>, myoepithelial and stromal cells.

322

### 323 **Associations between epithelial and immune cells and the impact of radiation treatment.**

324 There is growing evidence of immune-epithelial interactions in the regulation of tissue  
325 homeostasis and wound healing responses with macrophages and regulatory T-cells ( $T_{\text{regs}}$ ;  
326 FoxP3<sup>+</sup>) garnering the most attention (Naik et al., 2018). Through Notch-mediated signaling,  
327 mammary gland stem cells induced resident macrophages to produce Wnt ligands ultimately  
328 leading to mammary stem cell proliferation (Chakrabarti et al., 2018). Depletion of  $T_{\text{regs}}$  in the  
329 intestine leads to a reduction in LGR5<sup>+</sup> stem cells (Biton et al., 2018). Given the extensive ligand-  
330 receptor interactions between *Etv1*<sup>+</sup> cells and immune cells, it is interesting to speculate a  
331 functional role of *Etv1*<sup>+</sup> cells in directing the localization and activation of resident immune  
332 populations. In the epidermis, distinct cellular populations around the hair follicle produce distinct  
333 chemokines to direct innate immune cell populations (Mansfield and Naik, 2020). The interaction  
334 between *Etv1*<sup>+</sup> and FoxP3<sup>+</sup> cells via *Cdh1-Itae* (Table 1; encodes for E-cadherin and integrin- $\alpha$ -  
335 E) may represent the physical tethering of this sub-population of T-cells to the salivary epithelium  
336 under homeostasis (Agace et al., 2000). It's interesting to note that radiation treatment led to a 1.5-  
337 fold increase in  $T_{\text{regs}}$  without a concomitant change in *Etv1*<sup>+</sup> cells or macrophages. Given the  
338 extensive role macrophages and FoxP3<sup>+</sup> cells serve in injury and regeneration models, more work  
339 is required to unravel the impact of these  $T_{\text{regs}}$ -epithelial interactions population during SG  
340 dysfunction.

341 Radiation treatment also resulted in the greatest increase in CD4+CD8+ populations and  
342 the most DEGs observed in the CD4+CD8+ cells (Figure 4). Clinical evaluation of SMG by  
343 immunohistochemistry following radiotherapy has revealed increased T-cells (CD3+, CD4+ or  
344 CD8+) in the periacinar area and B cell (CD20+) nodules in the periductal area (Teymoortash et  
345 al., 2005). The DEGs in the CD4+CD8+ population suggest an imbalance in immune regulation  
346 following irradiation. Increases in KLF2 in IR PGs may represent a shift in T-cell populations as  
347 KLF2 is highly expressed in naïve and memory T-cells and downregulated by TCR activation and  
348 cytokine stimulation in effector T-cells (Preston et al., 2013). Additionally, high levels of KLF2  
349 inhibit T-cell proliferation and clonal expansion (Preston *et al.*, 2013). KLF6 also inhibits cell  
350 proliferation and is co-regulated with KLF2 in MCF-7 cells (Ebert et al., 2012). Thus, high levels  
351 of KLF2 and KLF6 coupled with a lack of cytokines and chemokines on the DEGs suggest that  
352 the increase in CD4+CD8+ T-cells may represent a naïve population; however further kinetic  
353 analysis is required. This is also supported by a decrease in *Ctla2a*, which encodes for a cysteine  
354 protease that serves an immunosuppressive function in retinal pigment epithelium (Sugita et al.,  
355 2008; Sugita et al., 2009) and promotes the conversion of CD4+ T cells to Treg cells via  
356 Transforming Growth Factor Beta (TGF $\beta$ ) signaling (Sugita et al., 2011). Lymphotoxin- $\beta$  (LT- $\beta$ ),  
357 encoded by *Ltb*, is a TNF family member cytokine that has been predominantly studied in  
358 development and organization of lymphoid tissues (McCarthy et al., 2006). LT- $\beta$  can mediate both  
359 regeneration and chronic tissue injury in epithelial organs via nuclear factor- $\kappa$ B (NF- $\kappa$ B) pathway  
360 (Tumanov et al., 2009; Wolf et al., 2010). Blocking the LT- $\beta$  receptor suppresses immune  
361 responses by modulating trafficking mechanisms and disrupts the progression of T1DM in NOD  
362 mice (McCarthy *et al.*, 2006). It is interesting to speculate whether the increased LT- $\beta$  interactions  
363 with *Tnfrsf1a* or *CD40* prevent the clearance of immune populations or maintenance of naïve T  
364 cells. *Ltb* is induced following oxidative stress (Wong, 1995) and has been proposed to enable  
365 communication between lymphocytes and stromal cells (Wolf *et al.*, 2010), findings that are  
366 corroborated by this work predicting increased interactions with stromal and immune cell  
367 populations post-IR (Figure 5).

368

369

370

371

372 **Limitations of the study**

373 A caveat of this study is the lack of isolation of basal ducts and peripheral nerve cells during PG  
374 dissociation, which were not represented. Similar limitations have been reported in other  
375 scRNAseq studies working with adult tissues, which could potentially be overcome using single  
376 nuclei RNAseq analysis. Furthermore, although multiple biological replicates were used, they  
377 were pooled together during dissociation prior to sequencing, thus, cell proportion changes should  
378 be considered with caution.

379

380 **Lead contact**

381 Further information and requests for resources and reagents should be directed to and will be  
382 fulfilled by the Lead Contact, Alejandro Chibly ([martinez-chibly.agustin@gene.com](mailto:martinez-chibly.agustin@gene.com))

383

384 **Materials Availability**

385 This study did not generate new unique reagents.

386

387 **Data and Code Availability**

388 The single-cell RNAseq libraries were deposited in GEO under accession number **GSE####**. The  
389 code used for analysis is available in github: [https://github.com/chiblya/scRNAseq\\_PG](https://github.com/chiblya/scRNAseq_PG). Ready-to-  
390 use Seurat objects are also available via figshare: 10.6084/m9.figshare.20406219

391

392 **Methods**

393 **C3H mice and irradiation (IR) treatment**

394 C3H female mice were used for the study and were housed at the NIDCR Veterinary Resource  
395 Core in accordance with IACUC guidelines. At 6-10 weeks of age, mice received IR treatment,  
396 which consisted a 6 Gy dose administered daily for 5 consecutive days. Mice were restrained using  
397 a Lucite Jig and IR treatment was targeted to the head and neck with an X-Rad 320ix system. The  
398 mice were housed for 10 months post-IR before scRNA-seq analysis.

399

400 **Single-cell Dissociation.** Parotid glands from 2 female mice per treatment were dissociated in a  
401 15ml gentleMACS C tube with 5ml of digestion enzyme using the human tumor dissociation kit  
402 (#130-095-929, Miltenyi Biotech, Auburn CA) in RPMI 1640 w/L-Glutamine (Cell applications,

403 Inc, USA). Cell dissociation was performed in a Miltenyi gentleMACS Octo Dissociator using the  
404 manufacturer's preset 37C\_h\_TDK\_2 program. Following dissociation, 5ml of RPMI media were  
405 added to the dissociated cells and centrifuged at 1100 rpm for 10 min. Cells were resuspended in  
406 RPMI 1640 w/L-Glutamine with 5% PenStrep (Gibco, USA) and washed twice with RPMI. Cells  
407 were passed through 70  $\mu$ m filters between centrifugation steps. Single-cell dissociation was  
408 confirmed by microscopic examination and cell concentration determined with a Cellometer  
409 (Nexcelom Biosciences). Cell concentration was adjusted to  $5 \times 10^5$  –  $1 \times 10^6$  cells/ml prior to  
410 analysis with a 10X genomics Next GEM Chromium controller.

411

412 **Library prep and sequencing:** Single-cell RNA-seq library preparation was performed at the  
413 NIDCR Genomics and Computational Biology Core using a Chromium Single Cell v3 method  
414 (10X Genomics) following the manufacturer's protocol. Pooled single-cell RNA-seq libraries  
415 were sequenced on a NextSeq500 sequencer (Illumina). Cell Ranger Single-Cell Software Suite  
416 (10X Genomics) was used for demultiplexing, barcode assignment, and unique molecular  
417 identifier (UMI) quantification using the mm10 reference genome (Genome Reference  
418 Consortium Mouse Build 38) for read alignment.

419

420 **Computational analysis:** Cell Ranger files were imported to SEURAT v3 using R & R Studio  
421 software and processed for clustering following their default pipeline. As a quality control  
422 measure, cells with fewer than 200 genes were not included in subsequent analyses, and those with  
423 >5% of UMIs mapping to mitochondrial genes were defined as non-viable or apoptotic and were  
424 also excluded. Normalization and scaling were performed following SEURAT's default pipeline.  
425 Data from control and irradiated glands were bioinformatically integrated prior to assigning cell  
426 annotations. 'Clustree' package was used to determine an optimal resolution for clustering and the  
427 resulting clusters were annotated based on the expression of known cell type markers. Cell-  
428 defining genes were determined using the 'FindAllMarkers' function which uses a Wilcoxon Rank  
429 Sum statistical test for analysis. Only genes with adjusted p-values <0.05 were considered as cell-  
430 defining genes. To identify differentially expressed genes between treatments, each population  
431 was compared individually using the 'FindMarkers' function from SEURAT package.

432

433

#### 434 **Ligand-receptor analysis**

435 A database of curated ligand-receptor pairs was downloaded from Ramikowski *et al.* (2015). We  
436 used scripted code in R to automate the search for ligand and receptor genes within our dataset and  
437 leverage that information against the curated database. Plots were generated using the ‘circlize’  
438 package in R. The code is available as supplementary material.

439

440 **Immunohistochemistry:** PGs were fixed in 4% paraformaldehyde overnight at 4°C and  
441 dehydrated with 70% Ethanol prior to paraffin embedding. 5µm sections were deparaffinized with  
442 xylene substitute for 10 minutes and rehydrated with reverse ethanol gradient for 5 minutes each.  
443 Heat induced antigen retrieval was performed using a microwave maintaining sub-boiling  
444 temperature for 10 minutes in a pH 6.0 Citrate Buffer (#21545, EDM Millipore, Darmstadt,  
445 Germany) . Sections were washed for 5 minutes with 0.1% Tween20 (Quality Biological, Inc) in  
446 PBS 1X (PBST). M.O.M.® (Mouse on Mouse) Immunodetection Kit (Vector Laboratories,  
447 Burlingame, CA) was used to block non-specific sites for 1 hour at room temperature followed by  
448 overnight incubation with primary antibodies at 4°C. Tissue sections were washed 3 times for 5  
449 minutes each with PBST and incubated in secondary antibodies and nuclear stain (Hoechst  
450 (Thermo Fisher Scientific, Marietta, OH)) at room temperature for 1 hour. Coverslips were  
451 mounted with Fluoro-Gel (Electron Microscopy Sciences, Hatfield, PA), and imaging was  
452 performed with a Nikon A1R confocal system.

453

454 **Stitch analysis:** Etv1+ cell defining genes from control parotid sample (Supplementary File 1)  
455 were directly imported into STITCH (<http://stitch.embl.de/>). For reproducibility, analysis was  
456 performed selecting a minimum interaction score of 0.7 and limited to less than 10 interactions.

457

#### 458 **Acknowledgments**

459 The authors thank the support from Dr. Daniel Martin, Dr. Robert Morell, and Dr. Erich Boger  
460 from the Genomics and computational biology core (GCBC) at NIDCR for contributing to library  
461 preparation and sequencing. This work used the NIDCR Veterinary Resources Core (ZIC  
462 DE000740-05) and computational resources of the NIH HPC Biowulf cluster (<http://hpc.nih.gov>).  
463 The GCBC funds were from the NIDCD Division of Intramural Research/NIH (DC000086 to the



464 GCBC). The study was supported by the Intramural Research Program of the National Institute of  
465 Dental and Craniofacial Research, NIH.

466

467 **Author Contributions**

468 Conceptualization, writing and editing, A.M.C, B.R, K.H.L; Methodology, A.M.C., B.R., M.C.P.,  
469 GCBC; Software, A.M.C, GCBC; Resources, M.P.H, K.H.L., A.M.C; Visualization, A.M.C.,  
470 B.R., M.C.P; Data curation, project administration, and supervision, A.M.C.

471

472 **Declaration of Interests**

473 The authors declare no competing interests.

## Figure Legends

### Figure 1. scRNAseq analysis of control and irradiated PG

- A) Single cell suspensions from 1-year-old control and irradiated PG from 2 C3H female mice were used to build scRNAseq libraries. Representative UMAP plots are colored by treatment group or cell type. Clusters were annotated based on the expression of known markers.
- B) Balloon Plot with top 5 differentially expressed genes per cluster sorted by fold change. Statistical analysis performed using SEURAT package in R. Color is relative to scaled gene expression and size of the dot represents the percentage of cells expressing the gene.
- C) Representative UMAP plots showing expression of *Etv1* and *Amy1*

### Figure 2. scRNAseq analysis of control and irradiated PG

- A) UMAP plot highlighting acinar, *Etv1*<sup>+</sup>, and duct populations with a representative heatmap of their gene expression profiles.
- B) Venn diagram of cell-defining genes in acinar and *Etv1*<sup>+</sup> clusters showing the number of unique and overlapping cell-defining genes. Representative genes from each group are shown. The bar graph shows the percentage of overlap between cell-defining genes in acinar and duct populations with *Etv1*<sup>+</sup> cells.
- C) Balloon plot showing expression of the 30 genes overlapping between acinar and *Etv1*<sup>+</sup> cells. Genes marked with an asterisk are differentially expressed between *Etv1*<sup>+</sup> and acinar cells ( $p < 0.05$ , Wilcoxon rank sum test (SEURAT)). Color is relative to scaled gene expression and size of the dot represents the percentage of cells within a cluster expressing the gene.
- D) Immunofluorescence staining of PG from 1 year-old C3H mice stained for *Etv1* (Red), NKCC1 (green) and DAPI (blue). The area delineated by the yellow dotted line is magnified to the right for visualization. Scale bar = 50um.
- E) Results from STITCH analysis showing top biological processes and KEGG pathways associated with defining-genes from *Etv1*<sup>+</sup> cells.

### Figure 3. Ligand-receptor analysis of *Etv1*<sup>+</sup> and acinar cells

- A) Bar graphs with number of identified ligands and receptors among cell-defining genes from epithelial populations.
- B) Balloon plots of expression of ligands and receptors enriched in *Etv1*<sup>+</sup> cells.

- C) Balloon plots of expression of ligands and receptors enriched in acinar cells.
- D) Chord plot summarizing putative ligand-receptor interactions with Etv1+ cell ligands. The arrows point to the cell expressing the corresponding receptors and are color-coded based on the source of the ligand. The thickness of the arrow is relative to the number of putative pairs identified between Etv1 cells and the cell type pointed by the arrow. Representative ligand-receptor pairs are shown beside the chord plots.
- E) Chord plot summarizing putative ligand-receptor interactions with Etv1+ cell receptors.
- F) Immunofluorescence staining for Smooth muscle actin (SMA, Red), NTRK2 (green) and Parotid Secretory Protein (PSP, blue). The area delineated by the yellow dotted line is magnified to the right for visualization. Scale bar = 50um.

#### **Figure 4. Cell-specific IR-induced DEGs**

- A) Representative UMAP of irradiated PG colored by cell type.
- B) Cell numbers and proportions in scRNAseq datasets from control and irradiated PG.
- C) Bar graph showing number of differentially expressed genes (DEGs) post-IR in individual cell populations. DE analysis was performed with SEURAT's default Wilcoxon test ( $p < 0.05$ ).
- D) Violin plots of top 5 (if present) up and downregulated genes in acinar and CD4+CD8+ T-cells. Red and blue arrows denote upregulated and downregulated genes, respectively.
- E) Representative output from gene ontology analysis with IR-induced DEGs in acinar and CD4+CD8+ T-cells showing dysregulated processes and their associated genes.

#### **Figure 5. Dysregulated ligand-receptor pairs post-IR**

- A) Violin plots of differentially expressed receptors.
- B) Violin plots of differentially expressed ligands.
- C) Chord plot of ligand-receptor interactions with IR-induced DE receptors
- D) Chord plot of ligand-receptor interactions with IR-induced DE ligands
- E) Summary table with putative ligand-receptor interactions with IR-induced ligands and receptors

## References

- Agace, W.W., Higgins, J.M., Sadasivan, B., Brenner, M.B., and Parker, C.M. (2000). T-lymphocyte-epithelial-cell interactions: integrin alpha(E)(CD103)beta(7), LEEP-CAM and chemokines. *Curr Opin Cell Biol* *12*, 563-568. [10.1016/s0955-0674\(00\)00132-0](https://doi.org/10.1016/s0955-0674(00)00132-0).
- Armingol, E., Officer, A., Harismendy, O., and Lewis, N.E. (2021). Deciphering cell-cell interactions and communication from gene expression. *Nature Reviews Genetics* *22*, 71-88. [10.1038/s41576-020-00292-x](https://doi.org/10.1038/s41576-020-00292-x).
- Biton, M., Haber, A.L., Rogel, N., Burgin, G., Beyaz, S., Schnell, A., Ashenberg, O., Su, C.-W., Smillie, C., Shekhar, K., et al. (2018). T Helper Cell Cytokines Modulate Intestinal Stem Cell Renewal and Differentiation. *Cell* *175*, 1307-1320.e1322. <https://doi.org/10.1016/j.cell.2018.10.008>.
- Chakrabarti, R., Celià-Terrassa, T., Kumar, S., Hang, X., Wei, Y., Choudhury, A., Hwang, J., Peng, J., Nixon, B., Grady, J.J., et al. (2018). Notch ligand Dll1 mediates cross-talk between mammary stem cells and the macrophageal niche. *Science* *360*, eaan4153. [10.1126/science.aan4153](https://doi.org/10.1126/science.aan4153).
- Chen, M., Lin, W., Gan, J., Lu, W., Wang, M., Wang, X., Yi, J., and Zhao, Z. (2022). Transcriptomic Mapping of Human Parotid Gland at Single-Cell Resolution. *J Dent Res* *101*, 972-982. [10.1177/00220345221076069](https://doi.org/10.1177/00220345221076069).
- Dirix, P., Nuyts, S., and Van den Bogaert, W. (2006). Radiation-induced xerostomia in patients with head and neck cancer: a literature review. *Cancer* *107*, 2525-2534. [10.1002/cncr.22302](https://doi.org/10.1002/cncr.22302).
- Ebert, R., Zeck, S., Meissner-Weigl, J., Klotz, B., Rachner, T.D., Benad, P., Klein-Hitpass, L., Rudert, M., Hofbauer, L.C., and Jakob, F. (2012). Krüppel-like factors KLF2 and 6 and Ki-67 are direct targets of zoledronic acid in MCF-7 cells. *Bone* *50*, 723-732. <https://doi.org/10.1016/j.bone.2011.11.025>.
- Eisbruch, A., Ten Haken, R.K., Kim, H.M., Marsh, L.H., and Ship, J.A. (1999). Dose, volume, and function relationships in parotid salivary glands following conformal and intensity-modulated irradiation of head and neck cancer. *Int J Radiat Oncol Biol Phys* *45*, 577-587. [10.1016/s0360-3016\(99\)00247-3](https://doi.org/10.1016/s0360-3016(99)00247-3).
- Ferreira, J.N.A., Zheng, C., Lombaert, I.M.A., Goldsmith, C.M., Cotrim, A.P., Symonds, J.M., Patel, V.N., and Hoffman, M.P. (2018). Neurturin Gene Therapy Protects Parasympathetic Function to Prevent Irradiation-Induced Murine Salivary Gland Hypofunction. *Molecular Therapy - Methods & Clinical Development* *9*, 172-180. <https://doi.org/10.1016/j.omtm.2018.02.008>.

Gao, X., Oei, M.S., Ovitt, C.E., Sincan, M., and Melvin, J.E. (2018). Transcriptional profiling reveals gland-specific differential expression in the three major salivary glands of the adult mouse. *Physiological Genomics* 50, 263-271. [10.1152/physiolgenomics.00124.2017](https://doi.org/10.1152/physiolgenomics.00124.2017).

Ghinelli, E., Johansson, J., Ríos, J.D., Chen, L.-L., Zoukhri, D., Hodges, R.R., and Dartt, D.A. (2003). Presence and Localization of Neurotrophins and Neurotrophin Receptors in Rat Lacrimal Gland. *Investigative Ophthalmology & Visual Science* 44, 3352-3357. [10.1167/iovs.03-0037](https://doi.org/10.1167/iovs.03-0037).

Grün, D., and van Oudenaarden, A. (2015). Design and Analysis of Single-Cell Sequencing Experiments. *Cell* 163, 799-810. <https://doi.org/10.1016/j.cell.2015.10.039>.

Grundmann, O., Mitchell, G.C., and Limesand, K.H. (2009). Sensitivity of Salivary Glands to Radiation: from Animal Models to Therapies. *Journal of Dental Research* 88, 894-903. [10.1177/0022034509343143](https://doi.org/10.1177/0022034509343143).

Hauser, B.R., Aure, M.H., Kelly, M.C., Hoffman, M.P., and Chibly, A.M. (2020). Generation of a Single-Cell RNAseq Atlas of Murine Salivary Gland Development. *iScience* 23, 101838. <https://doi.org/10.1016/j.isci.2020.101838>.

Henson, B.S., Eisbruch, A., D'Hondt, E., and Ship, J.A. (1999). Two-year longitudinal study of parotid salivary flow rates in head and neck cancer patients receiving unilateral neck parotid-sparing radiotherapy treatment. *Oral Oncology* 35, 234-241. [https://doi.org/10.1016/S1368-8375\(98\)00104-3](https://doi.org/10.1016/S1368-8375(98)00104-3).

Huang, N., Perez, P., Kato, T., Mikami, Y., Okuda, K., Gilmore, R.C., Conde, C.D., Gasmi, B., Stein, S., Beach, M., et al. (2021). SARS-CoV-2 infection of the oral cavity and saliva. *Nat Med* 27, 892-903. [10.1038/s41591-021-01296-8](https://doi.org/10.1038/s41591-021-01296-8).

Jensen, S.B., Pedersen, A.M., Vissink, A., Andersen, E., Brown, C.G., Davies, A.N., Dutilh, J., Fulton, J.S., Jankovic, L., Lopes, N.N., et al. (2010). A systematic review of salivary gland hypofunction and xerostomia induced by cancer therapies: prevalence, severity and impact on quality of life. *Support Care Cancer* 18, 1039-1060. [10.1007/s00520-010-0827-8](https://doi.org/10.1007/s00520-010-0827-8).

Jensen, S.B., Vissink, A., Limesand, K.H., and Reyland, M.E. (2019). Salivary Gland Hypofunction and Xerostomia in Head and Neck Radiation Patients. *J Natl Cancer Inst Monogr* 2019. [10.1093/jncimonographs/lgz016](https://doi.org/10.1093/jncimonographs/lgz016).

Kolodziejczyk, Aleksandra A., Kim, J.K., Svensson, V., Marioni, John C., and Teichmann, Sarah A. (2015). The Technology and Biology of Single-Cell RNA Sequencing. *Molecular Cell* 58, 610-620. <https://doi.org/10.1016/j.molcel.2015.04.005>.

Kuhn, M., von Mering, C., Campillos, M., Jensen, L.J., and Bork, P. (2008). STITCH: interaction networks of chemicals and proteins. *Nucleic Acids Res* 36, D684-688. [10.1093/nar/gkm795](https://doi.org/10.1093/nar/gkm795).

Li, Y., Taylor, J.M., Ten Haken, R.K., and Eisbruch, A. (2007). The impact of dose on parotid salivary recovery in head and neck cancer patients treated with radiation therapy. *Int J Radiat Oncol Biol Phys* 67, 660-669. [10.1016/j.ijrobp.2006.09.021](https://doi.org/10.1016/j.ijrobp.2006.09.021).

Lombaert, I.M.A., Patel, V.N., Jones, C.E., Villier, D.C., Canada, A.E., Moore, M.R., Berenstein, E., Zheng, C., Goldsmith, C.M., Chorini, J.A., et al. (2020). CERE-120 Prevents Irradiation-Induced Hypofunction and Restores Immune Homeostasis in Porcine Salivary Glands. *Molecular Therapy - Methods & Clinical Development* 18, 839-855. <https://doi.org/10.1016/j.omtm.2020.07.016>.

Mansfield, K., and Naik, S. (2020). Unraveling Immune-Epithelial Interactions in Skin Homeostasis and Injury. *Yale J Biol Med* 93, 133-143.

Mattingly, A., Finley, J.K., and Knox, S.M. (2015). Salivary gland development and disease. *Wiley Interdiscip Rev Dev Biol* 4, 573-590. [10.1002/wdev.194](https://doi.org/10.1002/wdev.194).

McCarthy, D.D., Summers-Deluca, L., Vu, F., Chiu, S., Gao, Y., and Gommerman, J.L. (2006). The lymphotoxin pathway. *Immunologic Research* 35, 41-53. [10.1385/IR:35:1:41](https://doi.org/10.1385/IR:35:1:41).

Miyazaki, Y., Nakanishi, Y., and Hieda, Y. (2004). Tissue interaction mediated by neuregulin-1 and ErbB receptors regulates epithelial morphogenesis of mouse embryonic submandibular gland. *Dev Dyn* 230, 591-596. [10.1002/dvdy.20078](https://doi.org/10.1002/dvdy.20078).

Mukherjee, A., Epperly, M.W., Shields, D., Hou, W., Fisher, R., Hamade, D., Wang, H., Saiful Huq, M., Bao, R., Tabib, T., et al. (2021). Ionizing irradiation-induced Fgr in senescent cells mediates fibrosis. *Cell Death Discov* 7, 349. [10.1038/s41420-021-00741-4](https://doi.org/10.1038/s41420-021-00741-4).

Naik, S., Larsen, S.B., Cowley, C.J., and Fuchs, E. (2018). Two to Tango: Dialog between Immunity and Stem Cells in Health and Disease. *Cell* 175, 908-920. <https://doi.org/10.1016/j.cell.2018.08.071>.

Nedvetsky, Pavel I., Emmerson, E., Finley, Jennifer K., Ettinger, A., Cruz-Pacheco, N., Prochazka, J., Haddox, Candace L., Northrup, E., Hodges, C., Mostov, Keith E., et al. (2014). Parasympathetic Innervation Regulates Tubulogenesis in the Developing Salivary Gland. *Developmental Cell* 30, 449-462. <https://doi.org/10.1016/j.devcel.2014.06.012>.

Oyelakin, A., Song, E.A.C., Min, S., Bard, J.E., Kann, J.V., Horeth, E., Smalley, K., Kramer, J.M., Sinha, S., and Romano, R.A. (2019). Transcriptomic and Single-Cell Analysis of the Murine Parotid Gland. *J Dent Res* 98, 1539-1547. [10.1177/0022034519882355](https://doi.org/10.1177/0022034519882355).

Paldor, M., Levkovitch-Siany, O., Eidelshstein, D., Adar, R., Enk, C.D., Marmary, Y., Elgavish, S., Nevo, Y., Benyamini, H., Plaschkes, I., et al. (2022). Single-cell transcriptomics reveals a

senescence-associated IL-6/CCR6 axis driving radiodermatitis. *EMBO Mol Med*, e15653. 10.15252/emmm.202115653.

Preston, G.C., Feijoo-Carnero, C., Schurch, N., Cowling, V.H., and Cantrell, D.A. (2013). The Impact of KLF2 Modulation on the Transcriptional Program and Function of CD8 T Cells. *PLOS ONE* 8, e77537. 10.1371/journal.pone.0077537.

Radfar, L., and Sirois, D.A. (2003). Structural and functional injury in minipig salivary glands following fractionated exposure to 70 Gy of ionizing radiation: an animal model for human radiation-induced salivary gland injury. *Oral Surg Oral Med Oral Pathol Oral Radiol Endod* 96, 267-274. 10.1016/s1079-2104(03)00369-x.

Ramilowski, J.A., Goldberg, T., Harshbarger, J., Kloppmann, E., Lizio, M., Satagopam, V.P., Itoh, M., Kawaji, H., Carninci, P., Rost, B., and Forrest, A.R. (2015). A draft network of ligand-receptor-mediated multicellular signalling in human. *Nat Commun* 6, 7866. 10.1038/ncomms8866.

Robar, J.L., Day, A., Clancey, J., Kelly, R., Yewondwossen, M., Hollenhorst, H., Rajaraman, M., and Wilke, D. (2007). Spatial and dosimetric variability of organs at risk in head-and-neck intensity-modulated radiotherapy. *Int J Radiat Oncol Biol Phys* 68, 1121-1130. 10.1016/j.ijrobp.2007.01.030.

Sandberg, R. (2014). Entering the era of single-cell transcriptomics in biology and medicine. *Nat Methods* 11, 22-24. 10.1038/nmeth.2764.

Sekiguchi, R., Martin, D., Genomics, Computational Biology, C., and Yamada, K.M. (2020). Single-Cell RNA-seq Identifies Cell Diversity in Embryonic Salivary Glands. *J Dent Res* 99, 69-78. 10.1177/0022034519883888.

Shamblott, M.J., O'Driscoll, M.L., Gomez, D.L., and McGuire, D.L. (2016). Neurogenin 3 is regulated by neurotrophic tyrosine kinase receptor type 2 (TRKB) signaling in the adult human exocrine pancreas. *Cell Communication and Signaling* 14, 23. 10.1186/s12964-016-0146-x.

Stuart, T., Butler, A., Hoffman, P., Hafemeister, C., Papalexi, E., Mauck, W.M., Hao, Y., Stoeckius, M., Smibert, P., and Satija, R. (2019). Comprehensive Integration of Single-Cell Data. *Cell* 177, 1888-1902.e1821. <https://doi.org/10.1016/j.cell.2019.05.031>.

Sugita, S., Horie, S., Nakamura, O., Futagami, Y., Takase, H., Keino, H., Aburatani, H., Katunuma, N., Ishidoh, K., Yamamoto, Y., and Mochizuki, M. (2008). Retinal Pigment Epithelium-Derived CTLA-2 $\alpha$  Induces TGF $\beta$ -Producing T Regulatory Cells. *The Journal of Immunology* 181, 7525. 10.4049/jimmunol.181.11.7525.

Sugita, S., Horie, S., Nakamura, O., Maruyama, K., Takase, H., Usui, Y., Takeuchi, M., Ishidoh, K., Koike, M., Uchiyama, Y., et al. (2009). Acquisition of T Regulatory Function in Cathepsin L-Inhibited T Cells by Eye-Derived CTLA-2 $\alpha$  during Inflammatory Conditions. *The Journal of Immunology* 183, 5013. 10.4049/jimmunol.0901623.

Sugita, S., Yamada, Y., Horie, S., Nakamura, O., Ishidoh, K., Yamamoto, Y., Yamagami, S., and Mochizuki, M. (2011). Induction of T Regulatory Cells by Cytotoxic T-Lymphocyte Antigen-2 $\alpha$  on Corneal Endothelial Cells. *Investigative Ophthalmology & Visual Science* 52, 2598-2605. 10.1167/iovs.10-6322.

Tabula Muris, C., Overall, c., Logistical, c., Organ, c., processing, Library, p., sequencing, Computational data, a., Cell type, a., Writing, g., et al. (2018). Single-cell transcriptomics of 20 mouse organs creates a Tabula Muris. *Nature* 562, 367-372. 10.1038/s41586-018-0590-4.

Tabula Sapiens, C., Jones, R.C., Karkanas, J., Krasnow, M.A., Pisco, A.O., Quake, S.R., Salzman, J., Yosef, N., Bulthaupt, B., Brown, P., et al. (2022). The Tabula Sapiens: A multiple-organ, single-cell transcriptomic atlas of humans. *Science* 376, eabl4896. 10.1126/science.abl4896.

Teos, L.Y., Zheng, C.Y., Liu, X., Swaim, W.D., Goldsmith, C.M., Cotrim, A.P., Baum, B.J., and Ambudkar, I.S. (2016). Adenovirus-mediated hAQP1 expression in irradiated mouse salivary glands causes recovery of saliva secretion by enhancing acinar cell volume decrease. *Gene Therapy* 23, 572-579. 10.1038/gt.2016.29.

Teymoortash, A., Simolka, N., Schrader, C., Tiemann, M., and Werner, J.A. (2005). Lymphocyte subsets in irradiation-induced sialadenitis of the submandibular gland. *Histopathology* 47, 493-500. 10.1111/j.1365-2559.2005.02256.x.

The Gene Ontology Consortium (2019). The Gene Ontology Resource: 20 years and still GOing strong. *Nucleic Acids Research* 47, D330-D338. 10.1093/nar/gky1055.

Trapnell, C. (2015). Defining cell types and states with single-cell genomics. *Genome Res* 25, 1491-1498. 10.1101/gr.190595.115.

Tumanov, A.V., Koroleva, E.P., Christiansen, P.A., Khan, M.A., Ruddy, M.J., Burnette, B., Papa, S., Franzoso, G., Nedospasov, S.A., Fu, Y.X., and Anders, R.A. (2009). T Cell-Derived Lymphotoxin Regulates Liver Regeneration. *Gastroenterology* 136, 694-704.e694. <https://doi.org/10.1053/j.gastro.2008.09.015>.

Vissink, A., Mitchell, J.B., Baum, B.J., Limesand, K.H., Jensen, S.B., Fox, P.C., Elting, L.S., Langendijk, J.A., Coppes, R.P., and Reylund, M.E. (2010). Clinical management of salivary gland hypofunction and xerostomia in head-and-neck cancer patients: successes and barriers. *Int J Radiat Oncol Biol Phys* 78, 983-991. 10.1016/j.ijrobp.2010.06.052.



Wang, Y., and Navin, Nicholas E. (2015). Advances and Applications of Single-Cell Sequencing Technologies. *Molecular Cell* 58, 598-609. <https://doi.org/10.1016/j.molcel.2015.05.005>.

Wolf, M.J., Seleznik, G.M., Zeller, N., and Heikenwalder, M. (2010). The unexpected role of lymphotoxin  $\beta$  receptor signaling in carcinogenesis: from lymphoid tissue formation to liver and prostate cancer development. *Oncogene* 29, 5006-5018. 10.1038/onc.2010.260.

Wong, G.H.W. (1995). Protective roles of cytokines against radiation: Induction of mitochondrial MnSOD. *Biochimica et Biophysica Acta (BBA) - Molecular Basis of Disease* 1271, 205-209. [https://doi.org/10.1016/0925-4439\(95\)00029-4](https://doi.org/10.1016/0925-4439(95)00029-4).

Xu, Y., Feng, S., Peng, Q., Zhu, W., Zu, Q., Yao, X., Zhang, Q., Cao, J., and Jiao, Y. (2021). Single-cell RNA sequencing reveals the cell landscape of a radiation-induced liver injury mouse model. *Radiation Medicine and Protection* 2, 181-183. 10.1016/j.radmp.2021.11.001.

Zappia, L., and Oshlack, A. (2018). Clustering trees: a visualization for evaluating clusterings at multiple resolutions. *GigaScience* 7. 10.1093/gigascience/giy083.

A)

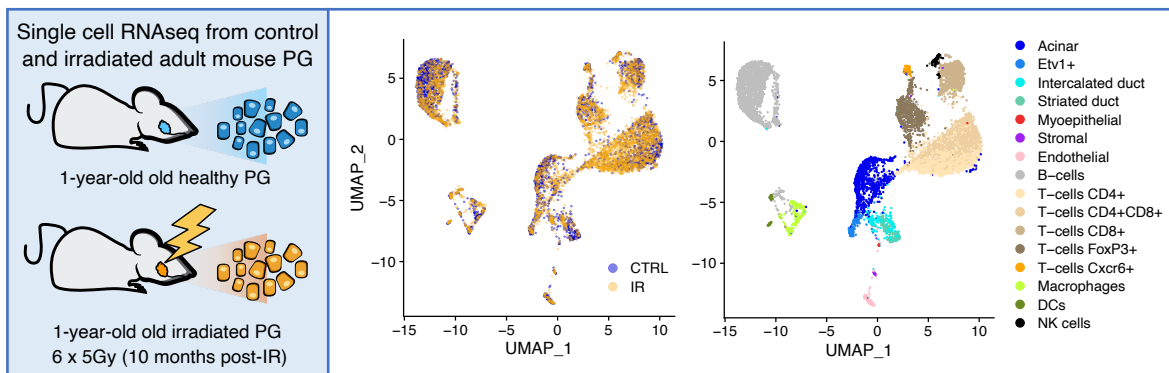

B) Control PG

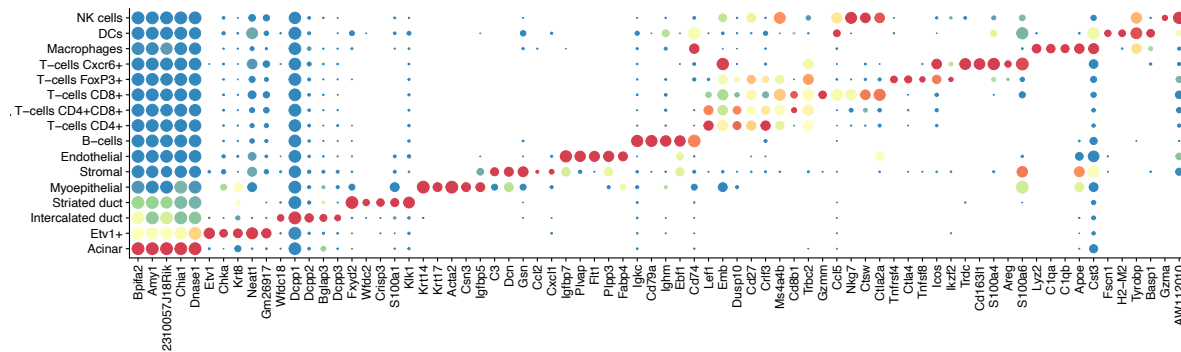

Percent Expressed

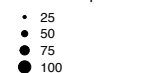

Average Expression

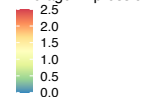

C)

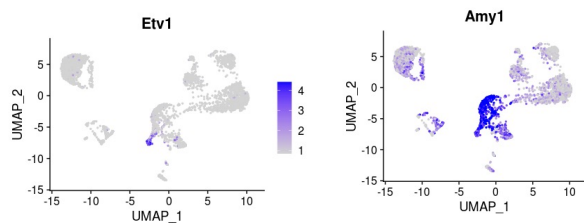

**Figure 1. scRNAseq analysis of control and irradiated PG**

- Single cell suspensions from 1-year-old control and irradiated PG from 2 C3H female mice were used to build scRNAseq libraries. Representative UMAP plots are colored by treatment group or cell type. Clusters were annotated based on the expression of known markers.
- Balloon Plot showing expression of the top 5 differentially expressed genes per cluster sorted by fold change. Statistical analysis performed using SEURAT package in R. Color is relative to scaled gene expression and size of the dot represents the percentage of cells expressing the gene.
- Representative UMAP plots showing expression of Etv1 and Amy1

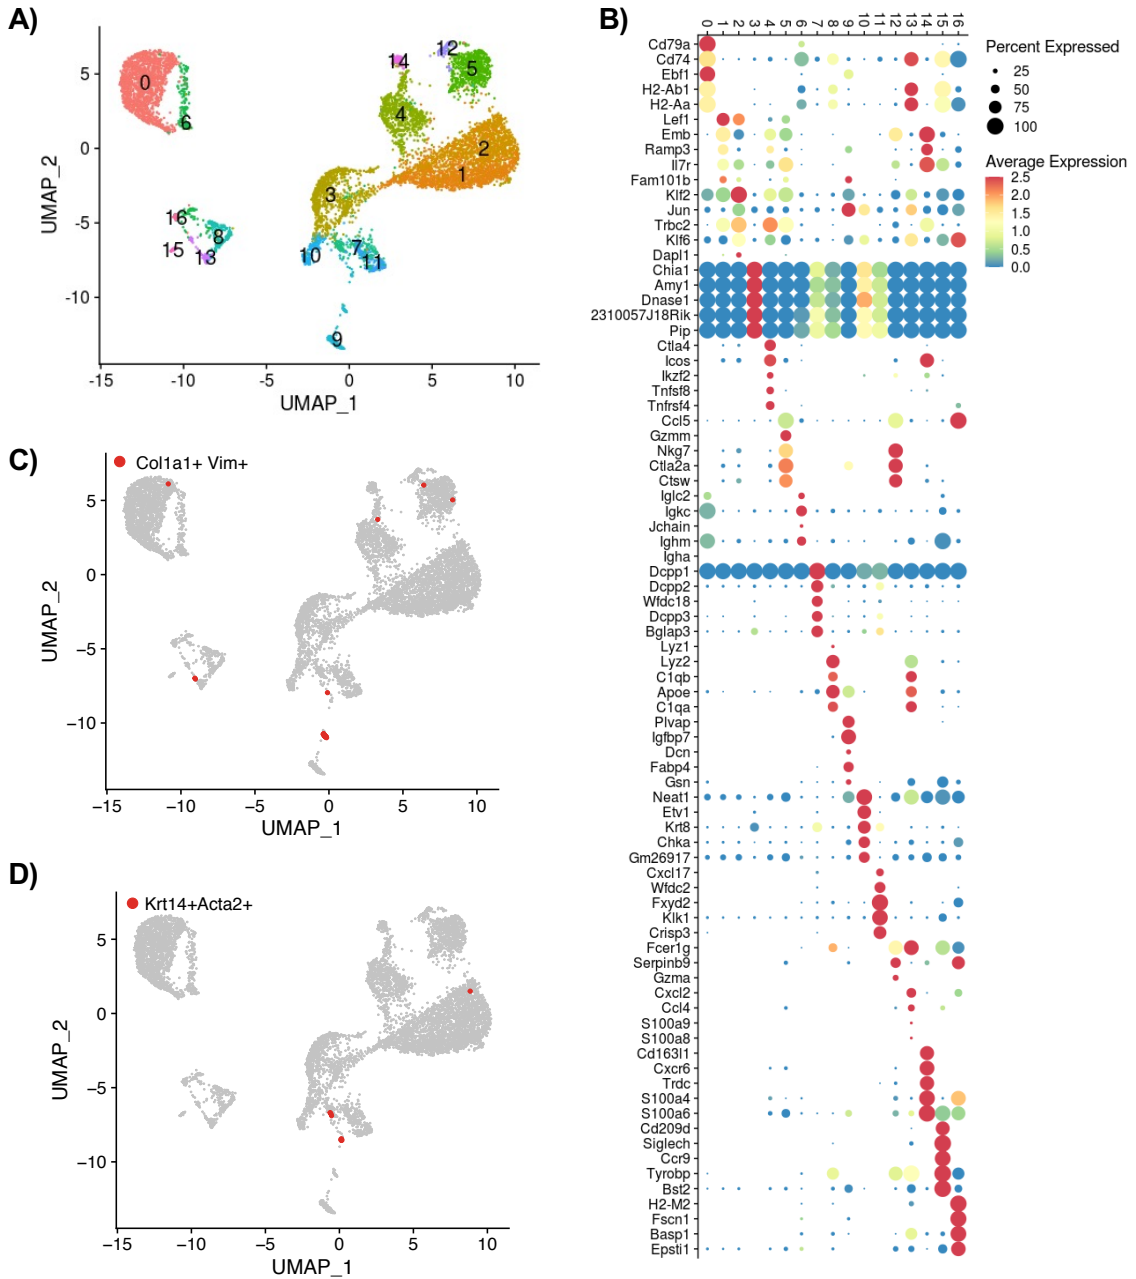

**Figure S1: Annotation strategy**

- A) Unsupervised clustering of integrated control and irradiated mouse parotid gland (n=1 per treatment)
- B) Balloon plot of top cluster-defining genes. Color is relative to scaled gene expression and size of the dot represents the percentage of cells within a cluster expressing the gene
- C) UMAP highlighting cells that express the stromal markers Col1a1 and Vim
- D) UMAP highlighting myoepithelial cells that express Krt14 and Acta2

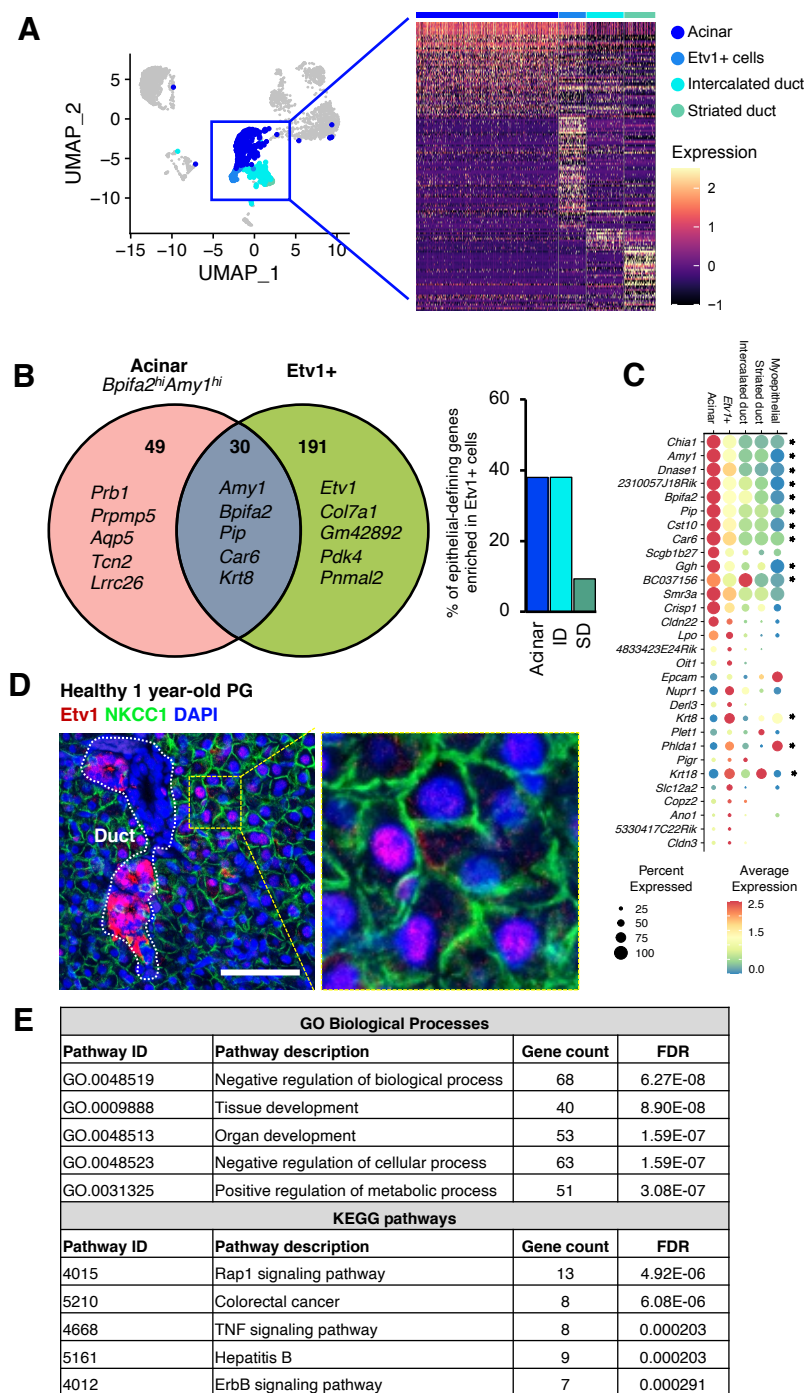

**Figure 2. scRNAseq analysis of control and irradiated PG**

- A) UMAP plot highlighting acinar, Etv1+, and duct populations with a representative heatmap of their gene expression profiles.
- B) Venn diagram of cell-defining genes in acinar and Etv1+ clusters showing the number of unique and overlapping cell-defining genes. Representative genes from each group are shown. The bar graph shows the percentage of overlap between cell-defining genes in acinar and duct populations with Etv1+ cells.
- C) Balloon plot showing expression of 30 cell-defining genes overlapping between acinar and Etv1+ cells. Genes marked with an asterisk are differentially expressed between Etv1+ and Acinar cells ( $p < 0.05$ , Wilcoxon rank sum test (SEURAT)). Color is relative to scaled gene expression and size of the dot represents the percentage of cells within a cluster expressing the gene.
- D) Immunofluorescence staining of PG from 1 year-old C3H mice stained for Etv1 (Red), NKCC1 (green) and DAPI (blue). The area delineated by the yellow dotted line is magnified to the right for visualization. Scale bar = 50um.
- E) Results from STITCH analysis showing top biological processes and KEGG pathways associated with defining-genes from Etv1+ cells.

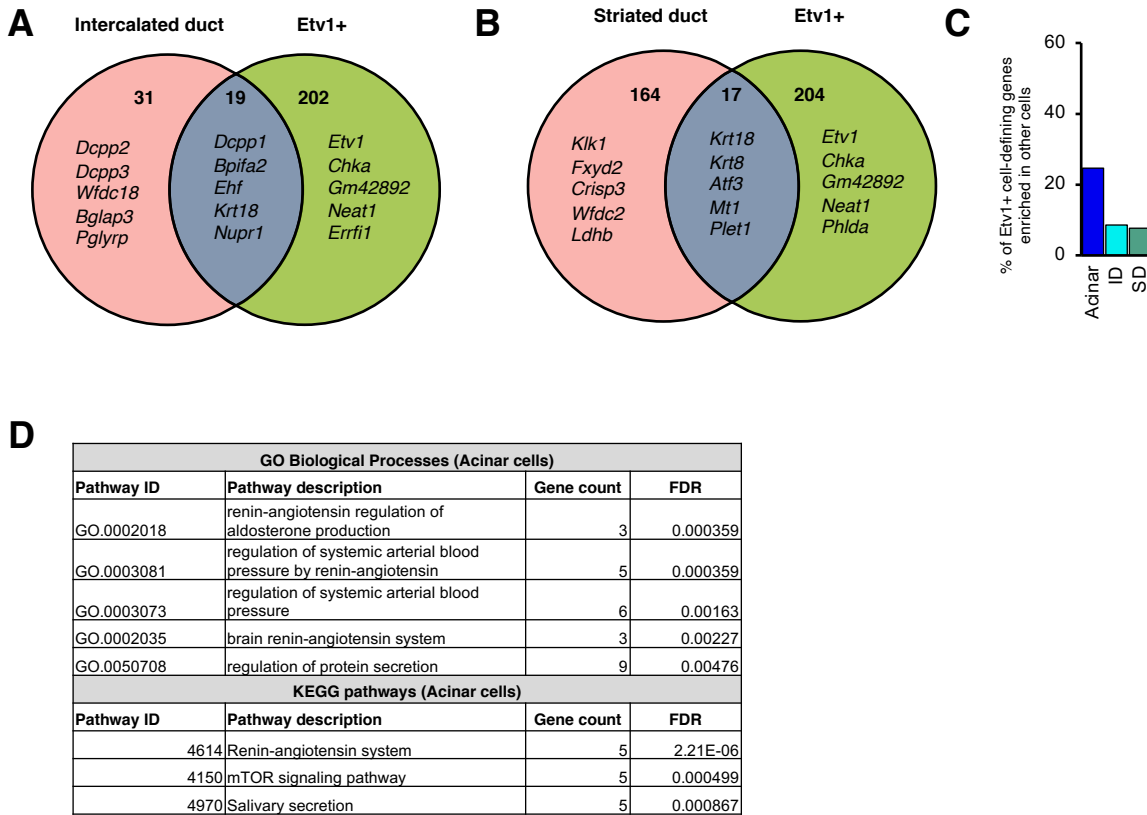

**Figure S2.**

- A) Venn diagram comparing defining genes for *Etv1+* and ID populations. The numbers in the left and right panels indicates the number of unique genes in the corresponding population whereas the number in the central panel reflects the overlap between the two populations.
- B) Venn diagram comparing defining genes for *Etv1+* and SD populations. The numbers in the left and right panels indicates the number of unique genes in the corresponding population whereas the number in the central panel reflects the overlap between the two populations.
- C) Bar graph with percentage of *Etv1+* defining genes enriched in other epithelial cells.
- D) Results from STITCH analysis showing top biological processes and KEGG pathways associated with defining-genes from acinar cells.

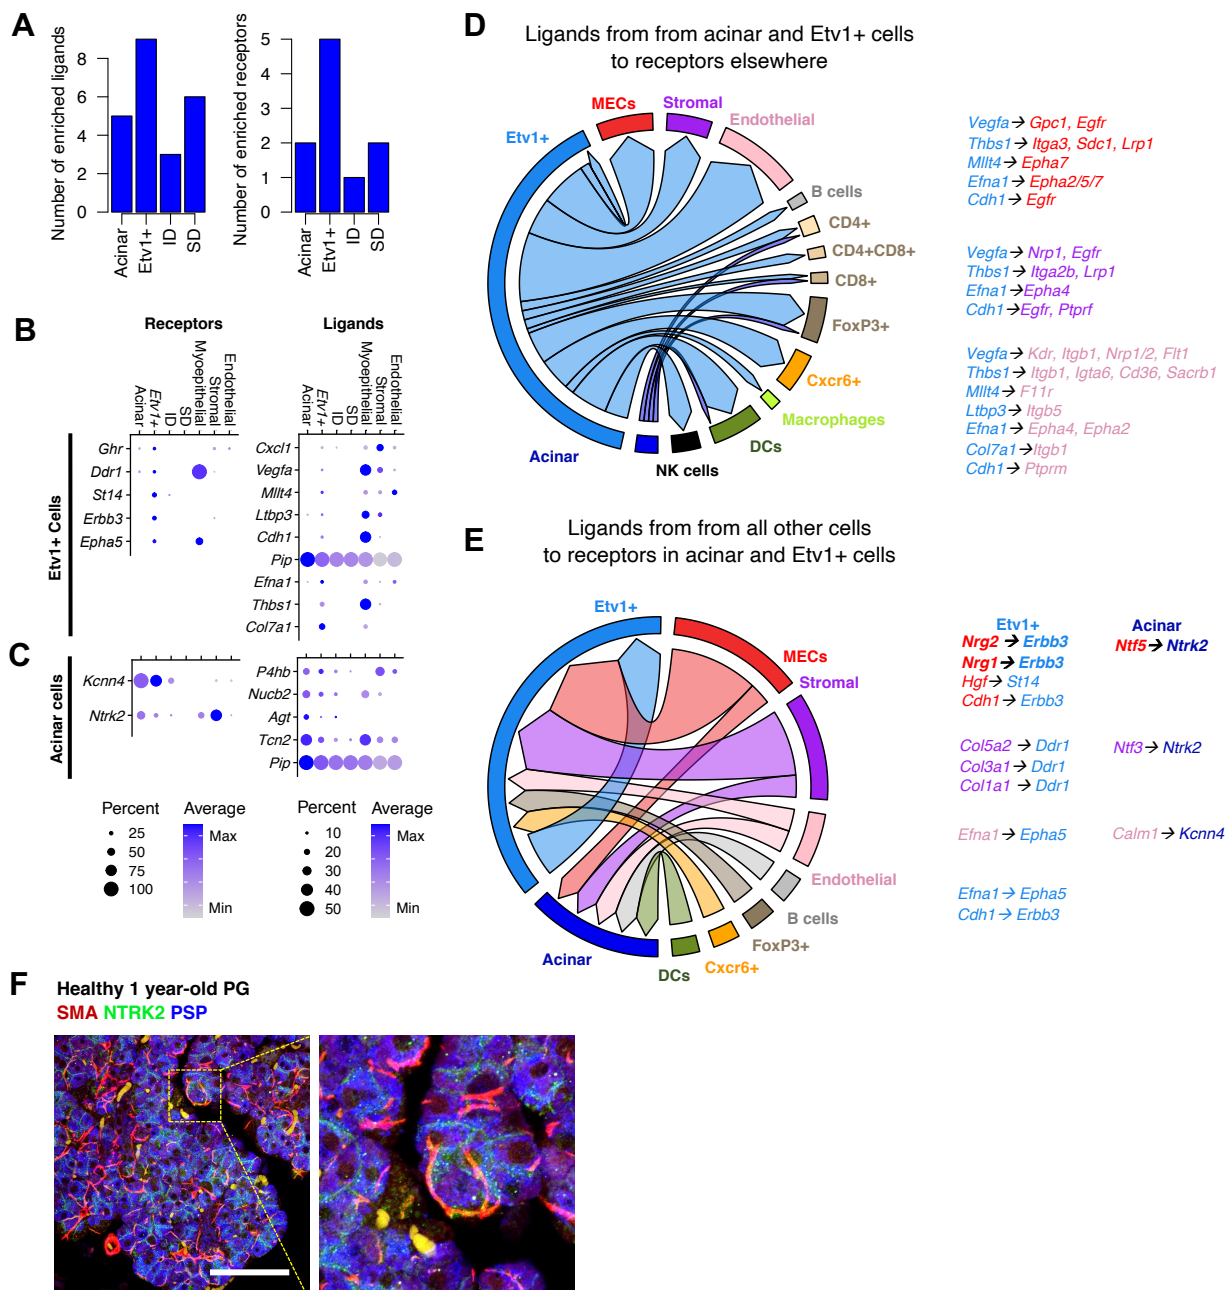

**Figure 3. Ligand-receptor analysis of Etv1+ and acinar cells**

- Bar graphs with number of identified ligands and receptors among cell-defining genes from epithelial populations.
- Balloon plots of expression of ligands and receptors enriched in Etv1+ cells.
- Balloon plots of expression of ligands and receptors enriched in acinar cells.
- Chord plot summarizing putative ligand-receptor interactions with Etv1+ cell ligands. The arrows point to the cell expressing the corresponding receptors and are color-coded based on the source of the ligand. The thickness of the arrow is relative to the number of putative pairs identified between Etv1 cells and the cell type pointed by the arrow. Representative ligand-receptor pairs are shown beside the chord plots.
- Chord plot summarizing putative ligand-receptor interactions with Etv1+ cell receptors.
- Immunofluorescence staining for Smooth muscle actin (SMA, Red), NTRK2 (green) and Parotid Secretory Protein (PSP, blue). The area delineated by the yellow dotted line is magnified to the right for visualization. Scale bar = 50µm.

# Supplementary Figure S3, related to Figure 3

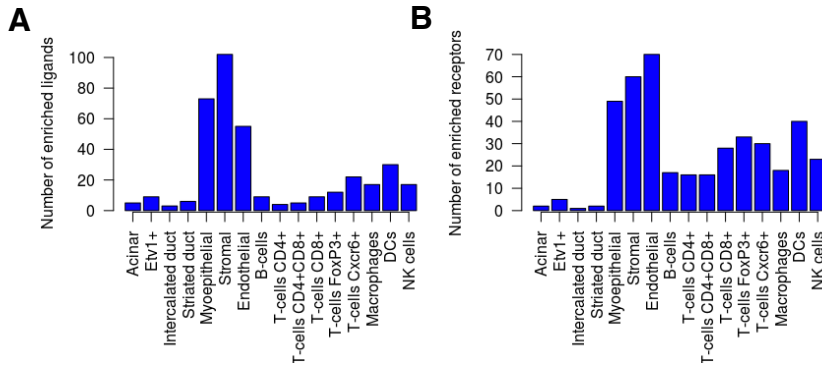

**Figure S3. Ligand-receptor analysis of Etv1+ and acinar cells**

A-B) Bar graphs with number of identified ligands and receptors among cell-defining genes from all populations.

Table 1: Outgoing ligand-receptor pairs in acinar and Etv1+ cells

| From: Acinar      |                 |          |
|-------------------|-----------------|----------|
| To                | Number of pairs | Pairs    |
| Acinar            | 0               |          |
| Etv1+             | 0               |          |
| Intercalated duct | 0               |          |
| Striated duct     | 0               |          |
| Myoepithelial     | 0               |          |
| Stromal           | 0               |          |
| Endothelial       | 0               |          |
| B-cells           | 0               |          |
| T-cells CD4+      | 1               | Pip_cd4  |
| T-cells CD4+CD8+  | 0               |          |
| T-cells CD8+      | 1               | Pip_nptn |
| T-cells FoxP3+    | 1               | Pip_cd4  |
| T-cells Cxcr6+    | 0               |          |
| Macrophages       | 0               |          |
| DCs               | 1               | Pip_nptn |
| NK cells          | 0               |          |

| From: Etv1+       |                 |                                                                                                                                                                                                           |
|-------------------|-----------------|-----------------------------------------------------------------------------------------------------------------------------------------------------------------------------------------------------------|
| To                | Number of pairs | Pairs                                                                                                                                                                                                     |
| Acinar            | 0               |                                                                                                                                                                                                           |
| Etv1+             | 2               | Efna1_ epha5, Cdh1_ erbb3                                                                                                                                                                                 |
| Intercalated duct | 0               |                                                                                                                                                                                                           |
| Striated duct     | 0               |                                                                                                                                                                                                           |
| Myoepithelial     | 10              | Vegfa_ egfr, Vegfa_ gpc1, Thbs1_ lrp1, Thbs1_ sdc1, Thbs1_ itga3, Mllt4_ epha7, Efna1_ epha2, Efna1_ epha7, Efna1_ epha5, Cdh1_ egfr                                                                      |
| Stromal           | 7               | Vegfa_ nrp1, Vegfa_ egfr, Thbs1_ itga2b, Thbs1_ lrp1, Efna1_ epha4, Cdh1_ egfr, Cdh1_ ptprf                                                                                                               |
| Endothelial       | 15              | Vegfa_ kdr, Vegfa_ nrp2, Vegfa_ itgb1, Vegfa_ ft1, Vegfa_ nrp1, Thbs1_ scarb1, Thbs1_ itga6, Thbs1_ cd36, Thbs1_ itgb1, Mllt4_ f11r, Ltbp3_ itgb5, Efna1_ epha2, Efna1_ epha4, Col7a1_ itgb1, Cdh1_ ptprm |
| B-cells           | 2               | Thbs1_ sdc4, Thbs1_ itga4                                                                                                                                                                                 |
| T-cells CD4+      | 2               | Thbs1_ itga6, Pip_ cd4                                                                                                                                                                                    |
| T-cells CD4+CD8+  | 2               | Thbs1_ itga6, Cdh1_ itgb7                                                                                                                                                                                 |
| T-cells CD8+      | 1               | Pip_ nptn                                                                                                                                                                                                 |
| T-cells FoxP3+    | 7               | Vegfa_ itgb1, Thbs1_ itgb1, Pip_ cd4, Col7a1_ itgb1, Cdh1_ itgae, Cdh1_ igf1r, Cdh1_ itgb7                                                                                                                |
| T-cells Cxcr6+    | 7               | Vegfa_ ret, Vegfa_ itgav, Thbs1_ sdc1, Thbs1_ itga3, Cdh1_ itgae, Cdh1_ igf1r, Cdh1_ itgb7                                                                                                                |
| Macrophages       | 2               | Vegfa_ sirpa, Ltbp3_ itgb5                                                                                                                                                                                |
| DCs               | 8               | Vegfa_ nrp2, Vegfa_ itgb1, Thbs1_ sdc4, Thbs1_ cd47, Thbs1_ itga4, Thbs1_ itgb1, Pip_ nptn, Col7a1_ itgb1                                                                                                 |
| NK cells          | 5               | Vegfa_ itgb1, Vegfa_ gpc1, Thbs1_ cd47, Thbs1_ itgb1, Col7a1_ itgb1                                                                                                                                       |



Table 2: Incoming ligand-receptor pairs in acinar and Etv1+ cells

| From              | To acinar       |             | To Etv1+ cells  |                                           |
|-------------------|-----------------|-------------|-----------------|-------------------------------------------|
|                   | Number of pairs | Pairs       | Number of pairs | Pairs                                     |
| Acinar            | 0               |             | 0               |                                           |
| B-cells           | 1               | Calm1_kcnn4 | 0               |                                           |
| DCs               | 1               | Calm1_kcnn4 | 0               |                                           |
| Endothelial       | 1               | Calm1_kcnn4 | 1               | Efna1_epha5                               |
| Etv1+             | 0               |             | 2               | Efna1_epha5, Cdh1_erb3                    |
| Intercalated duct | 0               |             | 0               |                                           |
| Macrophages       | 0               |             | 0               |                                           |
| Myoepithelial     | 1               | Ntf5_ntrk2  | 4               | Nrg2_erb3, Nrg1_erb3, Hgf_st14, Cdh1_erb3 |
| NK cells          | 0               |             | 0               |                                           |
| Striated duct     | 0               |             | 0               |                                           |
| Stromal           | 1               | Ntf3_ntrk2  | 3               | Col5a2_ddd1, Col3a1_ddd1, Col1a1_ddd1     |
| T-cells CD4+      | 0               |             | 0               |                                           |
| T-cells CD4+CD8+  | 0               |             | 0               |                                           |
| T-cells CD8+      | 0               |             | 0               |                                           |
| T-cells Cxcr6+    | 0               |             | 1               | Areg_erb3                                 |
| T-cells FoxP3+    | 0               |             | 1               | Areg_erb3                                 |

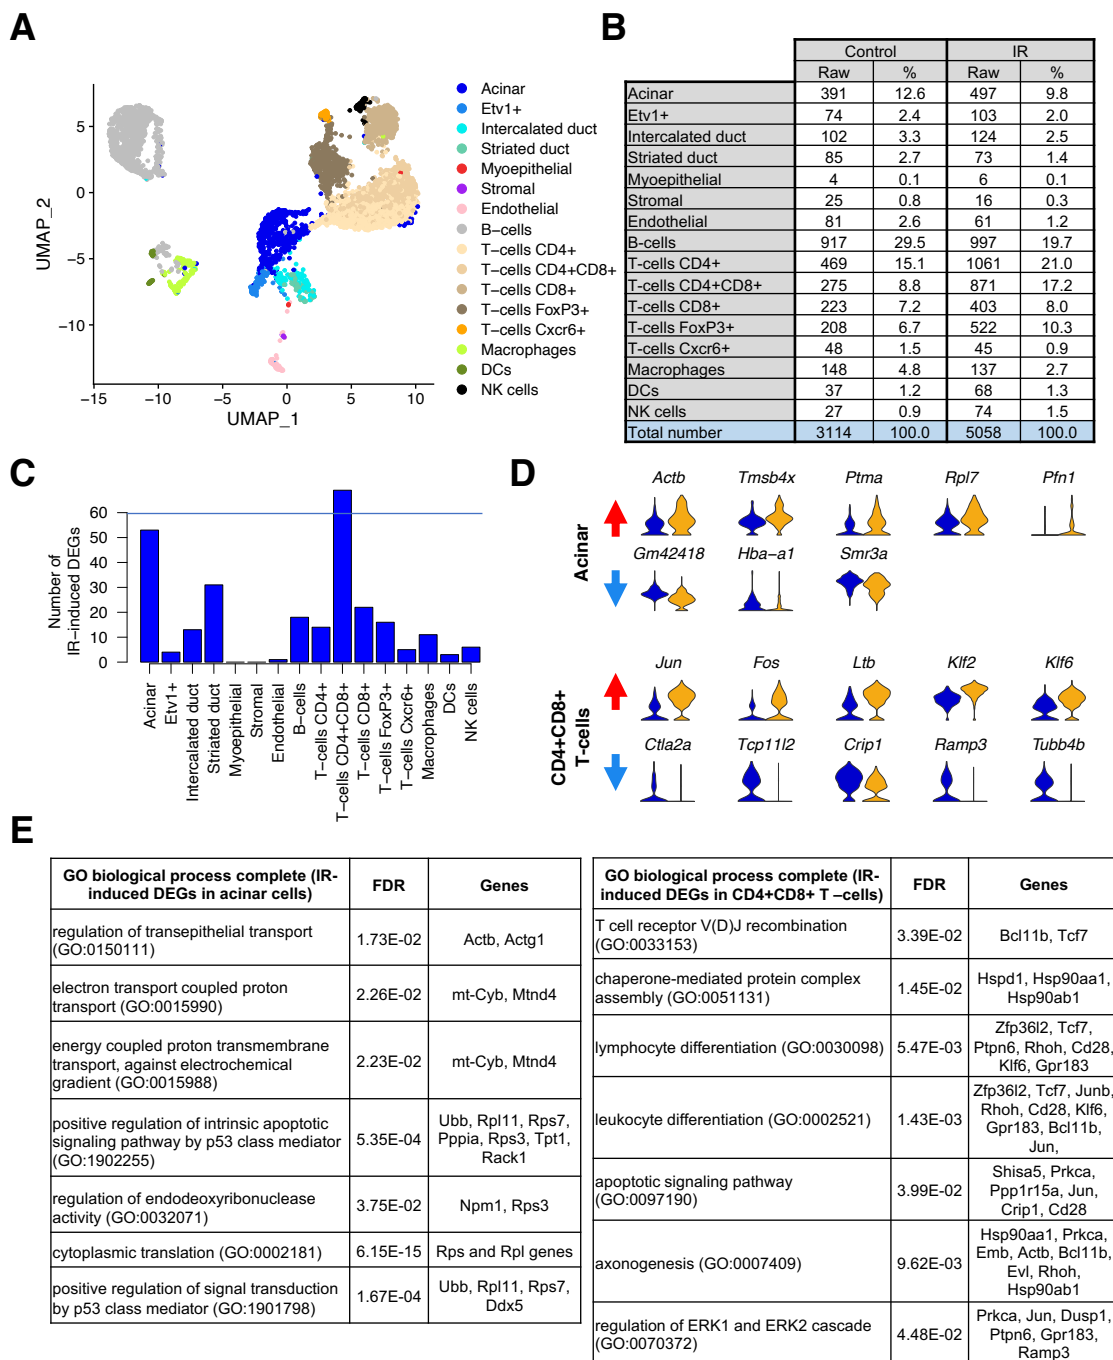

**Figure 4. Cell-specific IR-induced DEGs**

- Representative UMAP of irradiated PG colored by cell type.
- Cell numbers and proportions in scRNAseq datasets from control and irradiated PG.
- Bar graph showing number of differentially expressed genes (DEGs) post-IR in individual cell populations. DE analysis was performed with SEURAT's default Wilcoxon test ( $p < 0.05$ ).
- Violin plots of top 5 (if present) up and downregulated genes in acinar and CD4+CD8+ T-cells. Red and blue arrows denote upregulated and downregulated genes, respectively.
- Representative output from gene ontology analysis with IR-induced DEGs in acinar and CD4+CD8+ T-cells showing dysregulated processes and their associated genes.

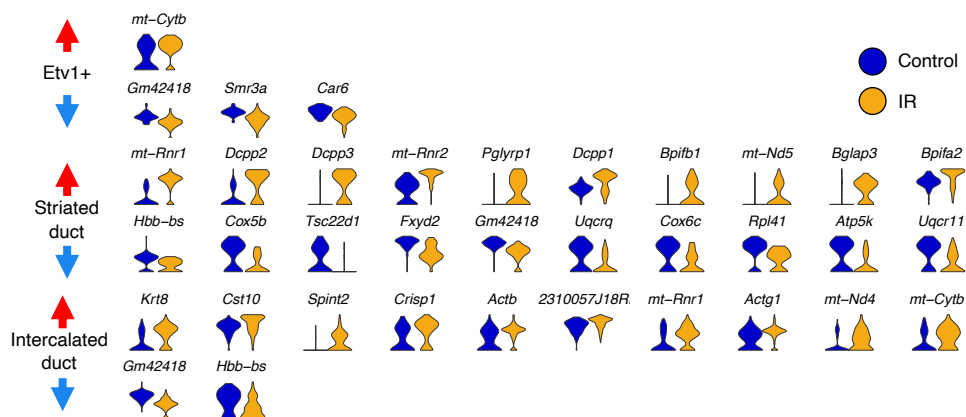

**Figure S4. Cell-specific IR-induced DEGs**

Violin plots of top 10 (if present) up and downregulated genes in epithelial populations. Red and blue arrows denote upregulated and downregulated genes, respectively.

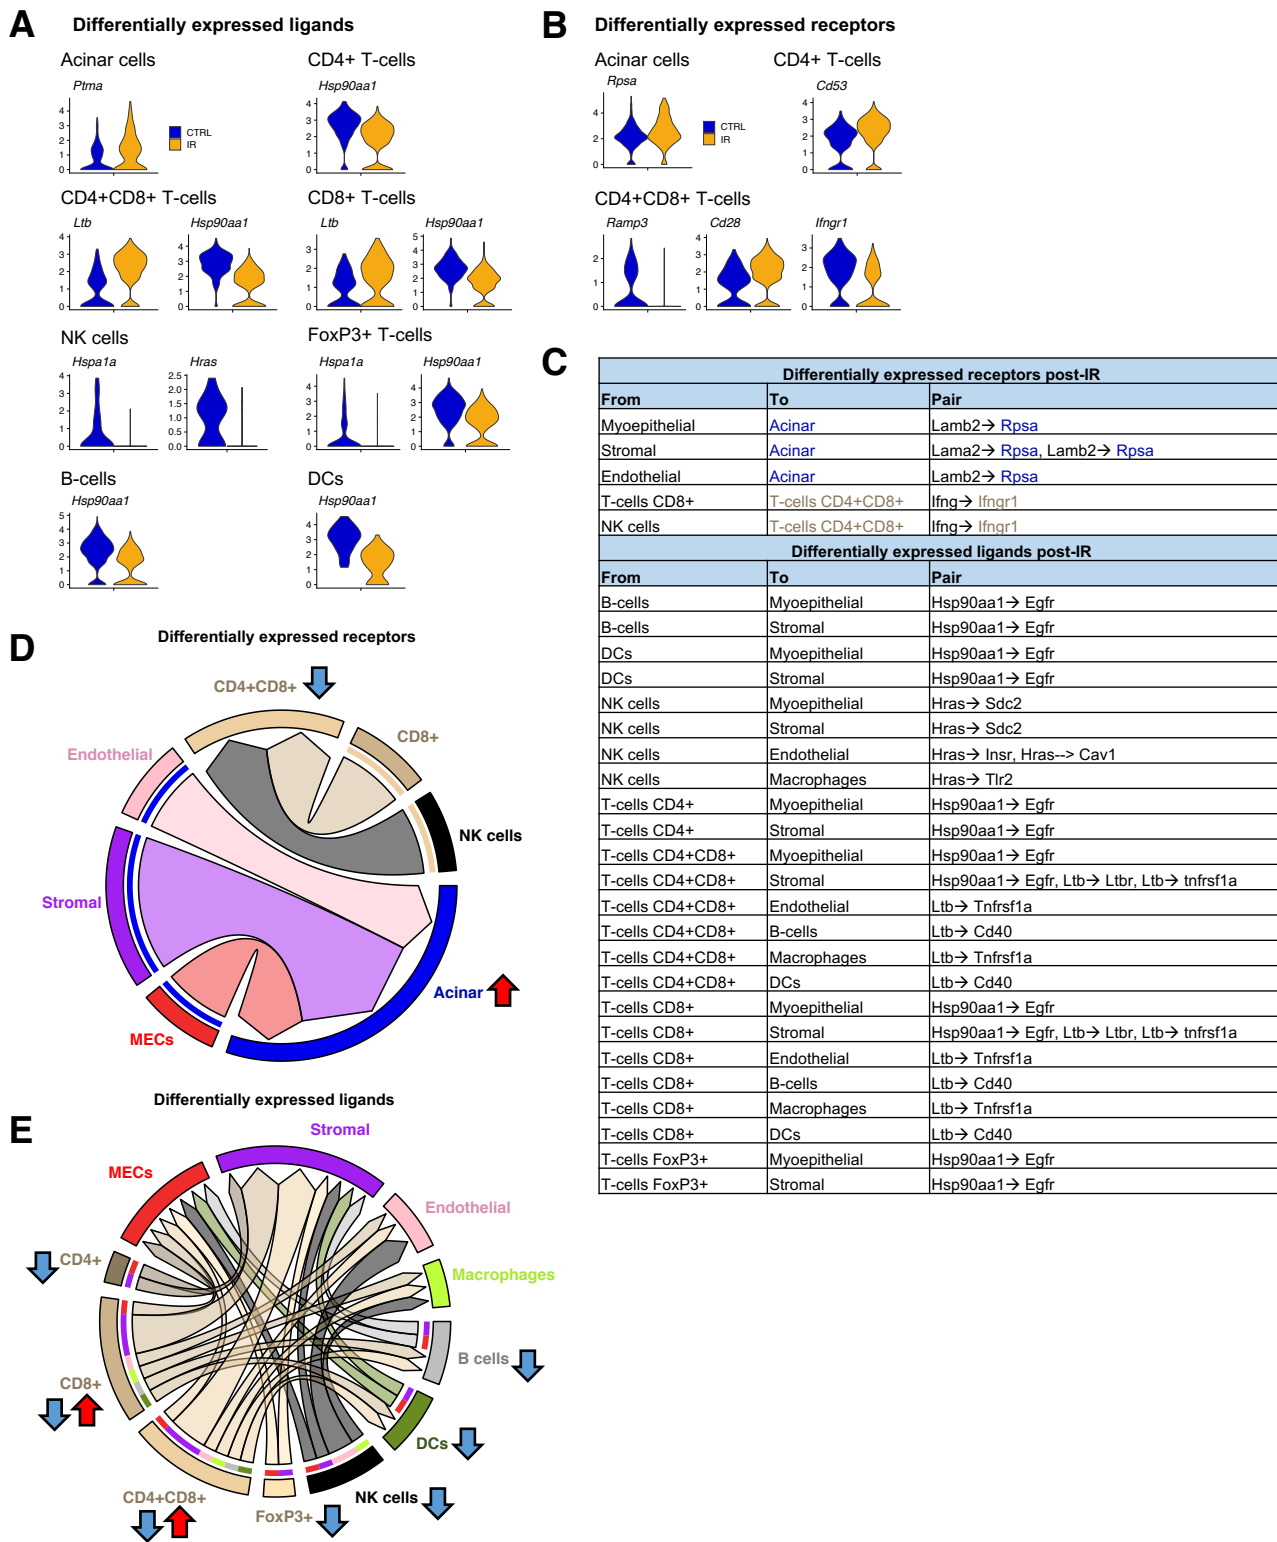

**Figure 5. Dysregulated ligand-receptor pairs post-IR**

- Violin plots of differentially expressed receptors.
- Violin plots of differentially expressed ligands.
- Chord plot of ligand-receptor interactions with IR-induced DE receptors
- Chord plot of ligand-receptor interactions with IR-induced DE ligands
- Summary table with putative ligand-receptor interactions with IR-induced ligands and receptors
